1 **Metabolic adaption to extracellular pyruvate triggers biofilm formation in**  
2 ***Clostridioides difficile***

3

4 Yannick D.N. Tremblay<sup>a,#,%</sup>, Benjamin A.R. Durand<sup>a§</sup>, Audrey Hamiot<sup>a¶</sup>, Isabelle Martin-  
5 Verstraete<sup>a,b</sup>, Marine Oberkamp<sup>a</sup>, Marc Monot<sup>c</sup> and Bruno Dupuy<sup>a#</sup>

6 <sup>a</sup> Laboratoire Pathogénèse des Bactéries Anaérobies, Institut Pasteur, UMR-CNRS 2001,  
7 Université de Paris, Paris, France

8 <sup>b</sup> Institut Universitaire de France

9 <sup>c</sup> Plateforme technologique Biomics, Institut Pasteur, Paris, France

10

11 Current address:

12 <sup>%</sup>YDNT: Department of Biochemistry, Microbiology and Immunology, University of  
13 Saskatchewan, Saskatoon, Canada

14 <sup>§</sup>BARD: Institut National de la Santé et de la Recherche Médicale (INSERM), U1047,  
15 Université Montpellier, UFR de Médecine, Nîmes, France

16 <sup>¶</sup>AH: UMR UMET, INRA, CNRS, Univ. Lille 1, 59650 Villeneuve d'Ascq, France

17

18 **Running title:** Exogenous pyruvate induces *C. difficile* biofilm formation

19

20 # To whom correspondence should be addressed: [yannick.tremblay@usask.ca](mailto:yannick.tremblay@usask.ca),  
21 [bruno.dupuy@pasteur.fr](mailto:bruno.dupuy@pasteur.fr)

22

23 **Abstract**

24 *Clostridioides difficile* infections are associated with gut microbiome dysbiosis and are  
25 the leading cause of hospital acquired diarrhoea. The infectious process is strongly  
26 influenced by the microbiota and successful infection relies on the absence of specific  
27 microbiota-produced metabolites. Deoxycholic acid (DOC) and short chain fatty acids  
28 are microbiota-produced metabolites that limit the growth of *C. difficile* and protect the  
29 host against this infection. In a previous study, we showed that DOC causes *C. difficile* to  
30 form strongly adherent biofilms after 48 h. Here, our objectives were to identify and  
31 characterize key molecules and events required for biofilm formation in the presence of  
32 DOC. We applied time-course transcriptomics and genetics to identify sigma factors,  
33 metabolic processes and type IV pili that drive biofilm formation. These analyses  
34 revealed that extracellular pyruvate induces biofilm formation in the presence of DOC.  
35 In the absence of DOC, pyruvate supplementation was sufficient to induce biofilm  
36 formation in a process that was dependent on pyruvate uptake by the membrane  
37 protein CstA. In the context of the human gut, microbiota-generated pyruvate is a  
38 metabolite that limits pathogen colonization. Taken together our results suggest that  
39 pyruvate-induced biofilm formation might act as a key process driving *C. difficile*  
40 persistence in the gut.

41 **Keywords:** *Clostridium difficile*, biofilm, deoxycholate, pyruvate

## 42 **Introduction**

43 *Clostridioides difficile*, formerly known as *Clostridium difficile*, causes infections  
44 associated with gut microbiome dysbiosis and is the leading cause of nosocomial  
45 diarrhea and colitis following antibiotic therapy (Crobach et al., 2018). While infections  
46 are typically associated with dysbiosis, recent epidemiological studies indicate that 5-  
47 15% of the population asymptotically carry *C. difficile* despite having a healthy  
48 microbiota (Crobach et al., 2018). There is also increasing evidence that *C. difficile*  
49 causes community acquired infections and is a zoonotic pathogen. Pets and farm  
50 animals asymptotically carry this pathogen and, as a result it is detected in retail  
51 meat. Based on these findings, *C. difficile* can now be viewed as a quintessential “One  
52 Health” pathogen (Lim et al. 2020).

53 The *C. difficile* infectious cycle depends on the ability of this anaerobic Gram-positive rod  
54 to sporulate. Once ingested from the surrounding environment or food, spores  
55 germinate in the ileum and then vegetative cells colonize the caecum (Crobach et al.,  
56 2018; Lim et al. 2020). Successful colonization relies on the disruption of the host’s  
57 microbiota (Abbas and Zackular, 2020; Ghimire et al. 2020; Girinathan et al., 2020;  
58 Pereira et al., 2020). The microbiota protects against *C. difficile* infection by producing  
59 metabolites including deoxycholic acid (DOC) and short chain fatty acids (SCFA) (Buffie  
60 et al., 2015; Studer et al. 2016; McDonald et al., 2018; Sobach et al. 2018; Seekatz et al.,  
61 2018). During dysbiosis specific members of the microbiota are missing, which results in  
62 altered SFCA and DOC production, thus allowing *C. difficile* to grow unimpeded (Abbas  
63 and Zackular, 2020). Following successful treatment of *C. difficile* infections (*via*  
64 antibiotic therapy or fecal transplant), the production of protective metabolites by the  
65 microbiota is slowly restored. Yet, relapses occur in more than 30% of patients  
66 following their first *C. difficile* infection and this rate increases to 50% after an initial

67 relapse (Crobach et al., 2018). The exact cause of relapse has not been fully elucidated  
68 and represents a major challenge for managing *C. difficile* infections. In 40% of relapse  
69 cases, patients are infected with the same strain that caused the initial infection,  
70 suggesting *C. difficile* persists in the gastrointestinal tract (Crobach et al., 2018).  
71 Persistence was initially associated with sporulation during antibiotic treatment,  
72 followed by germination after treatment. Evidence for this hypothesis was based on the  
73 inability of a non-sporulating *spo0A*-inactivated strain to persist and cause relapse in a  
74 murine infection model (Deakin et al. 2012). Inactivation of *spo0A* has pleiotropic effects  
75 influencing flagellar motility, metabolism, and biofilm-formation (Pettit et al. 2014;  
76 Dawson et al. 2012). This suggests that factors other than sporulation may also  
77 contribute to *C. difficile* persistence. We hypothesize that *C. difficile* forms multi-species  
78 biofilms in the gut which drives persistence in the presence of a normal microbiota  
79 (Donelli, et al, 2012; Crowther et al. 2014; Semenyuk et al, 2015). In support of this  
80 hypothesis, recent data from our laboratory showed that co-culture of *C. difficile* with  
81 *Clostridium scindens*, a bacterium that converts primary bile salts to secondary bile salts,  
82 promotes dual-species biofilm formation in the presence of cholate (Dubois et al. 2019).  
83 Typically, biofilms are defined as community of bacterial cells encased in self-produced  
84 polymeric matrix (Hall-Stoodley et al., 2004). This matrix is usually composed of any  
85 combination of proteins, extracellular DNA, or exopolysaccharides and matrix  
86 composition will vary from species to species. Biofilms provide a microenvironment that  
87 decrease the susceptibility of bacteria towards different environmental stressors,  
88 including antimicrobial compounds, to promote bacterial persistence. In *C. difficile*,  
89 biofilm formation is mediated by several surface structures (e.g. pili and the S-layer),  
90 environmental triggers (e.g. DOC and sub-MIC of antibiotics), quorum sensing (e.g. *luxS*),  
91 in addition to other determinants (e.g. c-di-GMP) (Đapa et al., 2013; Soutourina et al.,

92 2013; Boudry et al., 2014; Pantaléon et al., 2015; Walter et al., 2015; Maldarelli et al.,  
93 2016; Vuotto et al. 2016).

94 The aim of this study is to identify key factors that contribute to biofilm formation by *C.*  
95 *difficile* in response to DOC. We used time-course transcriptomics and genetic  
96 techniques to identify sigma factors, metabolic processes and adhesins that drive biofilm  
97 formation. We then demonstrate that extracellular pyruvate is the key metabolite that  
98 triggers biofilm formation and identify a *C. difficile* pyruvate importer involved in this  
99 process.

100

## 101 **Results**

### 102 **Overview of the time course transcriptomic analysis of *C. difficile* grown in the** 103 **presence of DOC**

104 In our previous study, we observed that when grown in the presence of sub-inhibitory  
105 concentrations of DOC, *C. difficile* enters stationary phase between 14 h and 20 h and by  
106 48h has formed a strong biofilm (Dubois et al 2019). To identify key events leading to  
107 biofilm formation in the presence of DOC, we performed a time course transcriptomic  
108 analysis on *C. difficile* grown in BHI supplemented with yeast extract, cysteine, glucose  
109 (BHISG) and 240  $\mu$ M DOC. For this analysis, time points were selected based on the  
110 growth curve. Planktonic bacterial cells were harvested in logarithmic phase (9 h),  
111 transition phase/early stationary phase (14 h), and mid-stationary phase (24 h); biofilm  
112 cells were harvested at 48 h. We then compared the expression profile of the cells at 14  
113 h, 24 h and 48 h using the 9 h time point as our reference point. Relative to the 9 h time  
114 point, a total of 262, 659 and 659 genes were down-regulated at 14 h, 24 h and 48 h,  
115 respectively, whereas a total of 218, 794 and 997 genes were up-regulated at 14h, 24h  
116 and 48h, respectively (Supplementary data). We started our analysis by focusing on cell  
117 surface structures known to contribute to biofilm formation. The genes encoding type  
118 IVa pili (T4aP) machinery [*pilA2* (CD630\_32940), *pilW* (CD630\_23050) and the *pilA1*  
119 cluster (CD630\_35030-CD630\_35130)] were upregulated in the DOC-induced biofilm  
120 cells (Supplementary data).

121

### 122 **Cell surface proteins and structures play a limited role in biofilm formation**

123 To see if the T4aP was critical for biofilm formation in the presence of DOC, the *pilA2*  
124 cluster (CD630\_32910-CD630\_32970), the major pilin *pilW* and the *pilA1* cluster were  
125 deleted. Deletion of the *pilA1* cluster resulted in a significant decrease in biofilm

126 formation but deletion of *pilW* or the *pilA2* cluster had no effect (Figure 1A). Given that  
127 the *pilA1* cluster was required for optimal biofilm formation, we tested the ability of a  
128 strain lacking the PilA1 major pilin to form biofilms (Poquet et al., 2018). Inactivation of  
129 *pilA1* (*CD630\_35130*) did not affect biofilm formation (Supplementary Figure S1A).  
130 T4aP gene expression is also under the control of c-di-GMP and overproduction of c-di-  
131 GMP results in measurable auto-aggregation and biofilm formation (Soutourina et al.,  
132 2013). Several c-di-GMP associated genes were up-regulated in biofilms (48 h)  
133 suggesting this signalling molecule might have a role (Supplementary Table 1 and  
134 Supplementary data). We then decided to test the effect of c-di-GMP overproduction on  
135 auto-aggregation in the presence of DOC. To do so, a *C. difficile* strain (CDIP634) with an  
136 inducible diguanylate cyclase (*CD630\_1420*) that overproduces c-di-GMP was grown in  
137 the presence or absence of DOC. When we compared CDIP634 to a parental control  
138 strain, we observed high levels of auto-aggregation in BHISG exclusively when c-di-GMP  
139 was overproduced (Supplementary Figure S1B). However, auto-aggregation was not  
140 observed in BHISG supplemented with DOC, suggesting that cells are insensitive to c-di-  
141 GMP overproduction under our biofilm forming conditions (Supplementary Figure S1B).  
142 In addition to the T4aP, several genes associated with cell surface proteins and  
143 structures were differentially regulated in our transcriptome analysis (Supplementary  
144 data). Among those, the collagen binding protein gene (*CD630\_28310*) was up-regulated  
145 at 24 h and 48 h, and *bcsA* (*CD630\_25450*), which encodes a protein with a cellulose  
146 synthase domain, was up-regulated at 48 h (Supplementary data). Given that  
147 *CD630\_28310* acts as an adhesin and BcsA could promote exopolysaccharide synthesis,  
148 we tested the ability of strains lacking either gene to form biofilm in the presence of  
149 DOC. Absence of either gene did not affect biofilm formation (Supplementary Figure  
150 S1A).

151 In our transcriptome data, we also observe that the F1 (late), F2 (glycolysation) and F3  
152 (early) clusters of the flagellum biogenesis gene clusters were down-regulated at 48 h  
153 (Supplementary data). Therefore, we tested the biofilm forming kinetics of a strain  
154 lacking the flagellin *fliC* and a strain lacking the alternative sigma factor for the flagellar  
155 operon *sigD* to see if inactivation of flagellum synthesis affects biofilm formation.  
156 Inactivation of *fliC* or *sigD* had no effect on biofilm formation or its kinetics (Figure 1B).  
157 This suggests that the flagellum is not required for biofilm formation and that absence of  
158 the flagellum does not enhance biofilm formation.  
159 Altogether, we show that the T4aP machinery encoded by the *pilA1* cluster is required  
160 for biofilm formation in the presence of DOC. Other surface proteins associated with  
161 biofilm formation in the absence of DOC (Dapa et al., 2013; Poquet et al., 2018) are  
162 dispensable, suggesting a distinct biofilm-formation mechanism.

163

### 164 **Biofilm formation in the presence of DOC is associated with profound metabolic** 165 **rearrangement**

166 We then analysed our time-course transcriptomic data using the Biocyc database for  
167 changes in metabolic pathways (see Supplementary Figure S2). As observed in our  
168 previous study (Dubois et al. 2019), genes encoding enzymes associated with glycolysis  
169 were down-regulated from 14 h onward (see Supplementary Figure S2 and  
170 Supplementary data). Furthermore, enzymes involved in reductive and oxidative  
171 Stickland reactions were up-regulated at 14 h and 24 h, but their expression was  
172 unchanged at 48 h. Genes associated with fermentation pathways such as butanoate  
173 were up-regulated at 24h but down-regulated at 48h (see Supplementary Figure S2 and  
174 Supplementary data). Interestingly, *C. difficile* appears to down-regulate genes  
175 associated with ethanolamine degradation (see Supplementary Figure S2 and



176 Supplementary data), a valuable nutrient source that is converted to acetyl-CoA  
177 (Nawrocki et al., 2018).

178 We also observed that PTS dependent glucose transporters were down-regulated from  
179 14 h onwards but a predicted glucose transporter (CD630\_30170) was up-regulated at  
180 48 h. Different PTS-dependent transporters predicted to import sugars other than  
181 glucose were up-regulated at different time point. Specifically, the mannitol importer  
182 genes (MtlFA) and the gene encoding a mannitol-1-phosphate 5-dehydrogenase (MtlD)  
183 were up-regulated at every time points (see Supplementary Figure S2 and  
184 Supplementary data). The PTSs predicted to transport fructose (CD630\_30130-  
185 CD630\_3015 and CD630\_24860-CD630\_2488) and/or mannose (CD630\_30670-  
186 CD630\_3069) were up-regulated at 48 h but the PTS-dependent fructose transporter  
187 FruABC was down-regulated at 14h and 24h (see Supplementary Figure S2 and  
188 Supplementary data). However, genes encoding enzymes processing fructose (FruK) or  
189 mannose (Pmi and CD630\_23180) were down-regulated at 14 h and 24h or 48h,  
190 respectively (see Supplementary Figure S2 and Supplementary data). Gene encoding  
191 PTS-dependent transported predicted to import maltose or N-acetylglucosamine were  
192 up-regulated at different time points. For example, CD630\_04690 was only up-regulated  
193 at 14h but CD630\_13360 was up-regulated at 48 h. However, genes encoding enzymes  
194 processing maltose or GlcNAc were not differently regulated (see Supplementary Figure  
195 S2 and Supplementary data). Furthermore, the genes encoding proteins that import and  
196 process N-acetylneuraminic acid (Neu5Ac) were up-regulated at 48 h (see  
197 Supplementary Figure S2 and Supplementary data). This could indicate that *C. difficile*  
198 might use different carbon source once glucose is depleted, probably near the 14h time  
199 point.

200 We then compared our transcriptome to a published omics analysis of *C. difficile* cells in  
201 different growth phases (Hofmann et al., 2018). Based on these comparisons, we found  
202 evidence that the cells harvested at 24 h have a transcriptome profile of stationary  
203 phase cell, (Figure 2). Specifically, transcription of genes associated with protein  
204 degradation, butanoate fermentation, acetate fermentation, glycine metabolism, and  
205 oxidative Stickland reaction of branched chained amino acids were up-regulated at 24 h  
206 (Figure 2 and Supplementary data) as observed for cells in the stationary phase  
207 (Hofmann et al., 2018). Expression of these genes decreased at 48 h (Figure 2). Other  
208 genes that were up-regulated during stationary phase were those associated with  
209 cysteine biosynthesis, pantothenate biosynthesis, riboflavin biosynthesis, ferrous iron  
210 transport, flavodoxin and chaperones (Figure 2) but these genes remain induced at 48 h  
211 in our analysis (Supplementary data). On the other hand, genes associated with  
212 glycolysis were down-regulated at 24 h as observed for the stationary phase analysis  
213 and their expression remains down-regulated in biofilm cells at 48 h (Figure 2).  
214 Interestingly, genes involved in protein synthesis were down-regulated at 24 h but their  
215 expression increased at 48 h (Figure 2 and Supplementary data).  
216 Overall, these metabolic changes overlap with our previous analysis comparing cells  
217 grown in BHISG in the presence or absence of DOC at 48h (Dubois et al., 2019). For  
218 example, we observe at 48h down-regulation of genes involved in glycolysis and up-  
219 regulation of genes predicted to encode transporters of alternate carbon source (see  
220 Supplementary Figure S2 and Supplementary data). This clearly supports the idea that  
221 DOC induces a metabolic stress in *C. difficile* and long-term exposure to DOC results in a  
222 remodelling of the metabolic profile of *C. difficile*. We also clearly see that the 24 h  
223 transcriptomic signature of *C. difficile* grown in BHISG in the presence of DOC resembles

224 cells in a stationary phase but at 48 h, once *C. difficile* is in a biofilm state, metabolic  
225 activity and transcriptional activity increase.

226

227 **The transition phase regulator SigH is required for DOC-induced biofilm**  
228 **formation**

229 In *C. difficile*, SigH and SinR modulate Spo0A expression and activity in addition to  
230 mediating the transition from exponential to stationary phase (Saujet et al., 2011;  
231 Girinathan et al., 2018). Therefore, based on the observation that *spo0A* inactivation  
232 decreases biofilm formation in the presence of DOC (Dubois et al., 2019; Figure 3A) in  
233 combination with our time course transcriptomic analysis indicating the effect of major  
234 transcriptional changes associated with stationary phase, we tested the effect of SigH  
235 and SinR on biofilm formation. Inactivation of *sigH* results in decreased biofilm-  
236 formation whereas inactivation of *sinR* did not have an effect (Figure 3A and  
237 Supplementary Figure S3A).

238 Inactivation of *sigH* decreased biofilm formation to a lower level than observed in the  
239 *spo0A* inactivated strain. Given that our time-course transcriptome did not show  
240 changes in *spo0A* expression, our data suggest that genes other than *spo0A* that are  
241 under SigH control contribute to biofilm formation. To identify SigH controlled genes  
242 that contribute to biofilm formation, we compared the list of genes with a SigH binding  
243 site in their promoter (Saujet et al., 2011) with our transcriptome and identified specific  
244 genes that were up-regulated at 24 h (Supplementary Table 2). We selected 4 genes  
245 (*CD630\_08650*, *CD630\_12640*, *cwp29* and *CD630\_34580*) that were not involved in  
246 sporulation, transcription or metabolism and we tested their expression in the *sigH::erm*  
247 strain and the parental strain grown in BHISG with DOC at 24 h. The expression of  
248 *CD630\_08650* and *cwp29* was greatly reduced in the absence of SigH whereas the

249 expression of *CD630\_12640* and *CD630\_34580* was only moderately reduced  
250 (Supplementary Figure S3B). This confirmed that expression of *CD630\_08650* and *cwp29*  
251 is controlled by SigH in our biofilm inducing condition.  
252 Based on these results, we deleted *CD630\_08650* and *cwp29* and tested the ability of the  
253 resulting strains to form biofilm. Deletion of either gene did not have an effect on biofilm  
254 formation (Figure 3B). Unfortunately, efforts to generate a strain lacking both  
255 *CD630\_08650* and *cwp29* were unsuccessful. When we tested the viability of the *sigH::erm*  
256 strain, this strain had a one log reduction in viability compared to the parental strain  
257 (Supplementary Figure S3C). The viability of the *spo0A::erm* strain is not affected in our  
258 conditions (Dubois et al., 2019). The decrease in viability of the *sigH::erm* strain  
259 provides a possible explanation for the reduction in biofilm formation. Based on our  
260 previous study, we know that biofilm formation in the presence of DOC is not dependent  
261 on sporulation (Dubois et al., 2019). In addition, SigH and Spo0A contribute to metabolic  
262 adaptation of *C. difficile* (Saujet et al., 2011; Pettit et al. 2014). Taken together, the sub-  
263 optimal metabolic profile of these strains might result in a decrease in biofilm formation  
264 highlighting the impact of metabolism in *C. difficile* persistence.

265

### 266 **PTS mediated transport and cysteine metabolism are required for DOC-induced** 267 **biofilm formation**

268 Given our transcriptomic data shows changes in metabolism, we next tested the effect of  
269 inactivating different metabolism-associated genes. We first tested the role of cysteine  
270 metabolism because several genes associated with this metabolic pathway were  
271 differentially regulated in our transcriptomic analysis (Figure 2 and Supplementary  
272 data). Inactivation of the OAS-thiol-lyase encoding gene *cysK*, which participate in  
273 cysteine biosynthesis, did not alter biofilm formation (Supplementary Figure S4A). We

274 then tested inactivation of the sigma factor encoding gene, *sigL* and deletion of the SigL-  
275 controlled cysteine desulfidase encoding gene, *cdsB*, important for amino acid  
276 degradation and cysteine catabolism resulting in the production of pyruvate and sulfide,  
277 respectively (Dubois et al., 2016 and Gu et al., 2018). Inactivation of *sigL* greatly reduced  
278 biofilm formation by *C. difficile*, whereas deletion of *cdsB* had an intermediate phenotype  
279 that was highly variable (Figure 3C). Complementation of the *sigL::erm* and  $\Delta$ *cdsB* strain  
280 with *sigL* or *cdsB* expressed from their native promoter on a plasmid restored biofilm  
281 formation (Supplementary Figure S4B).

282 We then targeted the phosphotransferase system (PTS) and carbon catabolite  
283 repression (CCR) regulatory network by deleting *ptsI* that encodes enzyme I of the PTS  
284 and deleting *hprK* that encodes the Hpr kinase which is involved in carbon metabolism  
285 regulation and transport. Biofilm formation was abolished in the  $\Delta$ *ptsI* strain whereas  
286 only a slight reduction in biofilm formation was observed in the  $\Delta$ *hprK* strain (Figure  
287 3D). Complementation of the  $\Delta$ *ptsI* strain with inducible *ptsI* on a plasmid restored  
288 biofilm formation (Supplementary Figure S4B). These observations support our  
289 previously published results (Dubois et al., 2019) showing that the presence of glucose  
290 and carbon metabolism are essential for DOC-induced biofilm formation. However, there  
291 might be some redundancy within the carbon metabolism regulation network because  
292 deletion of *hprK* had limited and variable effects. These findings are in line with our  
293 transcriptomic analysis indicating that a profound metabolic reorganisation occurs prior  
294 to DOC-induced biofilm formation. Given that biofilm formation and glucose transport  
295 are both PTS dependent, our data suggest that *C. difficile* must first use glucose and then  
296 switch its metabolic profile to use different metabolic pathways, including those  
297 dependent on SigL, SigH and Spo0A to induce biofilm formation in the presence of DOC.

298 To elucidate the downstream metabolic pathways driving biofilm-formation, we  
299 targeted genes identified in our transcriptomic analysis associated with the conversion  
300 of fumarate to pyruvate (*fumAB-CD630\_10500*), Neu5Ac transport and metabolism  
301 (*nanEAT*), proline metabolism (*prdB*), low intracellular NADH/NAD<sup>+</sup> activated regulator  
302 (*rex*) and the ferric uptake regulator (*fur*). We then tested the ability of these gene  
303 deletion and inactivation strains to form biofilms. Every strain tested formed biofilms  
304 similar to the parental strain (Figure 3E) with the exception of the *fur::erm* strain that  
305 had a slight growth delay in BHISG+DOC while biofilm levels reached that of the parental  
306 strain by 72 h (data not shown). Taken together, our results suggest that BHISG provides  
307 multiple and redundant nutrient sources and only specific nutrients such as glucose and  
308 cysteine are essential for DOC-induced biofilm formation in *C. difficile*.

309

### 310 **Branched-chain amino acids and mucus-derived sugars potentiate the effect of** 311 **DOC**

312 The use of a complex medium (BHISG) in the biofilm formation assay made it difficult to  
313 identify specific metabolic processes and metabolites involved in DOC-induced biofilm  
314 formation. Therefore, we sought to optimize a minimal medium that could support  
315 biofilm formation in the presence of DOC. We first tested the *C. difficile* minimal medium  
316 (CDMM) described by Cartman and Minton (2010) with some modifications. Specifically,  
317 glucose and cysteine were increased to 100 mM and 0.1%, respectively, to match the  
318 concentrations present in our complex medium. We also tested different sources of  
319 amino acids and/or peptides. To increase the biofilm biomass, we used our  
320 transcriptomic data to identify key metabolic pathways that were up-regulated during  
321 biofilm formation and observed that predicted branched chain amino acid (BCAA)  
322 transporters (*CD630\_12590*, *CD630\_12600*, *CD630\_27020*) were up-regulated at 24 h.

323 Therefore, we added BCAA to our semi-defined medium and observed an increase in  
324 biofilm biomass when the medium was supplemented with BCAA, cysteine and a  
325 carbohydrate source, such as glucose (Figure 4A, 4B and Supplementary Figure S5A).  
326 We noted that only casein hydrolysate from Oxoid supported biofilm formation while  
327 casamino acids from Difco or a mixture of individual essential amino acids did not  
328 (Supplementary Figure S5A). The resulting medium that supported biofilm formation  
329 was named *C. difficile* Medium Optimized for Biofilm formation (CDMOB).  
330 In addition to BCAA transporters being up-regulated during biofilm formation, the  
331 Neu5Ac transporter was also up-regulated in our transcriptomic analysis  
332 (Supplementary data). Thus, we tested if mucus-derived sugars potentiate DOC-induced  
333 biofilm formation. Mucus is typically broken down into different hexose sugars including  
334 glucose, GlcNAc, fucose, Neu5Ac, galactose and N-acetylgalactosamine (GalNAc) and  
335 GlcNAc and Neu5Ac acquisition is important for *C. difficile* growth in the intestinal tract  
336 (Ng et al., 2013; Pereira et al., 2020). We tested the effect of these sugars on biofilm  
337 formation. When CDMOB was supplemented with DOC and 100 mM of each sugar; the  
338 addition of glucose, GlcNAc or Neu5Ac induced biofilm formation, whereas addition of  
339 fucose, galactose and GalNAc had no effect (Figure 4C). We then sought to see if  
340 combining different sugars has additive effects on biofilm formation. When glucose and  
341 GlcNAc were mixed at concentrations below those required for biofilm formation (100  
342 mM), the mixture supported biofilm formation at levels equivalent to those with a single  
343 sugar (Figure 4D). We then tested the biofilm-formation ability of a strain lacking the  
344 *nanEAT* operon in the presence of 100 mM Neu5Ac. This operon encodes a non-PTS  
345 transporter (*nanT*), an acetylneuraminate lyase (*nanaA*) and the N-acetylmannosamine-  
346 6-phosphate 2-epimerase (*nanE*), involved in the metabolism of Neu5Ac  
347 (Supplementary Figure S2). In the absence of *nanEAT* but not *ptsI*, *C. difficile* failed to



348 form a biofilm in CDMOB supplemented with DOC and 100 mM Neu5Ac (Figure 4E).  
349 Taken together, our results reinforce the idea that metabolized sugars (glucose, GlcNAc  
350 and Neu5Ac) potentiate the effect of DOC (see Dubois et al 2019).  
351 To further characterize the biofilm formed in CDMOB supplemented with glucose  
352 (CDMOBG) and DOC, we analysed the composition of the biofilm matrix by enzymatic  
353 dispersion of preformed biofilms and by gel electrophoresis of the isolated matrix. As  
354 observed previously with biofilm formed in BHISG supplemented with DOC (Dubois et al  
355 2019), Na<sub>2</sub>PO<sub>4</sub> treatment, which denatures polysaccharides, failed to disperse  
356 preformed biofilms, while DNase-treatment dispersed preformed biofilms  
357 (Supplementary Figure S5B). Unlike what was observed in BHISG with DOC, proteinase  
358 K treatment dispersed preformed biofilms from cells grown in CDMOBG with DOC.  
359 When we analysed biofilm matrix of cells grown in CDMOBG with DOC, we observed  
360 extracellular DNA (eDNA) and patterns of proteins, glycoproteins and DNase/proteinase  
361 resistant material (e.g. polysaccharides or glycosylated amyloid-like fibers) that was  
362 similar to that of the biofilm matrix of *C. difficile* grown in BHISG with DOC  
363 (Supplementary Figure S5C, D and E). However, the high molecular weight smear  
364 observed in BHISG with DOC disappeared from the matrix of biofilms from cells grown  
365 in CDMOBG with DOC (Supplementary Figure S5E and S5F). This disappearance  
366 suggests that either *C. difficile* produces high molecular weight glycol molecules in  
367 BHISG with DOC or that the smear is from component(s) of the medium in our samples.  
368 Taken together, our data indicate that the biofilm formed in CDMOBG with DOC is  
369 similar to the one formed in BHISG with DOC but proteins play a larger role in  
370 maintaining biofilm matrix stability when *C. difficile* is grown in CDMOBG with DOC.

371

372 **Extracellular pyruvate is required for biofilm formation in CDMMBG with DOC**



373 Given that we detect biofilm formation at 48h but not 24h, we hypothesized that *C.*  
374 *difficile* detects high-cell density via quorum sensing. In support of this hypothesis, we  
375 observed up-regulation at 24 h of the genes encoding the autoinducer *agr* and its  
376 associated transporter protein, while *luxS* was down-regulated (Supplementary data).  
377 Deletion of the autoinducer *agr* operon or inactivation of *luxS* did not alter DOC-induced  
378 biofilm formation (Supplementary Figure S4A).  
379 Since deletion of typical quorum sensing molecules did not appears to alter DOC-  
380 induced biofilm formation, we hypothesized that a metabolite could drive this lifestyle  
381 switch. We analysed the volatile and non-volatile acid content of spent culture  
382 supernatants. After 24 h of growth in BHISG with DOC, pyruvic acid levels were high and  
383 these levels were decreased at 48 h. In the absence of DOC, pyruvic acid levels were  
384 lower, but the level did not decrease over time (Supplementary Figure S6A).  
385 Based on this analysis, we hypothesized that high level of extracellular pyruvate was  
386 important for initiating DOC-induced biofilm formation. To build on this observation, we  
387 tested the effect of pyruvate depletion on biofilm formation by adding pyruvate  
388 dehydrogenase to *C. difficile* cultures. When extracellular pyruvate was enzymatically  
389 depleted by pyruvate dehydrogenase addition at 24 h in CDMOBG with DOC, biofilm  
390 formation was inhibited. This effect was not observed when heat inactivated pyruvate  
391 dehydrogenase or buffer were added to CDMOBG with DOC at 24h (Figure 5A). Based on  
392 these data, we conclude that pyruvate might act as a critical molecule triggering *C.*  
393 *difficile's* switch from a planktonic to a biofilm lifestyle in the presence of DOC.

394

### 395 **Pyruvate induces biofilm formation in the absence of DOC**

396 To test if pyruvate alone could induce biofilm formation, we supplemented CDMOB or  
397 CDMOBG with increasing concentrations of pyruvate (25, 50 and 100 mM). When added

398 at inoculation, pyruvate induced biofilm formation in CDMOB and CDMOBG at 100 mM  
399 and 50 mM respectively (Figure 5B and 5C). When it was added after 8h of growth (log  
400 to stationary phase transition), pyruvate only induced biofilm formation in CDMOBG at  
401 100 mM (Figure 5C). We also added pyruvate after 24 h of growth but this failed to  
402 induce biofilm formation (Data not shown). This indicates the metabolic state of the  
403 bacteria partially determine whether pyruvate will induce biofilm formation. We then  
404 tested if pyruvate could cooperate with DOC to support biofilm formation and observed  
405 that 25 mM, instead of 100 mM pyruvate was sufficient to support biofilm formation in  
406 CDMOB with DOC (Figure 5D). However, glucose and pyruvate did not have a  
407 cooperative effect when added at 50 mM and 12.5 mM, respectively (Figure 5D). When  
408 we consider our biofilm formation assay, the gas chromatography data and our pyruvate  
409 depletion assay, our results indicate that biofilm-formation depends on the amount of  
410 available pyruvate and suggests that this metabolite is a key factor driving DOC-induced  
411 biofilm formation.

412

413 **Induction of biofilm formation requires pyruvate sensing by the *CD630\_26010-***  
414 ***26020* TCS and pyruvate importer *CstA***

415 In a previous study, we identified a LytRS two-component regulatory system (TCS)  
416 homologue (*CD630\_26020-CD630\_26010*) that regulated toxin gene expression in  
417 response to pyruvate (Dubois et al. 2016). In other Gram-positive bacteria, genes  
418 encoding TCSs sensing pyruvate are associated with a pyruvate importer and a gene  
419 encoding a potential importer (*CD630\_26000*) that is located immediately downstream of  
420 *CD630\_26010*. *CD630\_26000* encodes a *CstA* homologue that was initially annotated as a  
421 peptide transporter, but homologues were recently shown to be pyruvate importers in  
422 *Escherichia coli* (Hwang et al. 2018). To determine if *CstA* or TCS *CD630\_26020-26010* are

423 involved in biofilm formation and respond to pyruvate availability, we deleted *cstA* and  
424 tested whether the  $\Delta cstA$  strain and the previously described *CD630\_26020::erm* strain  
425 (Dubois et al., 2016) form biofilms in CDMOB with 100 mM pyruvate and CDMOBG with  
426 50 mM pyruvate. Pyruvate was added at inoculation and the  $\Delta ptsI$  strain, unable to uptake  
427 PTS-dependent sugars, was used as a positive or negative control when pyruvate was  
428 added alone or with glucose, respectively, to the growth medium.

429 In CDMOB supplemented with 100 mM pyruvate as the sole carbon source, the  
430 *CD630\_26020::erm* and  $\Delta cstA$  strains did not form biofilm whereas, as expected, the  
431  $\Delta ptsI$  and parental strain formed biofilms (Figure 6A). In CDMOBG supplemented with  
432 50 mM pyruvate, the *CD630\_26020::erm* and  $\Delta cstA$  strains formed biofilms whereas the  
433  $\Delta ptsI$  strain did not form a biofilm (Figure 6B). The inability of the  $\Delta ptsI$  strain to form a  
434 biofilm in the presence of glucose confirms that glucose metabolism is required for  
435 biofilm formation. This might be due to the production of pyruvate by glycolysis which  
436 would increase the level of extracellular pyruvate above the threshold required to  
437 induce biofilm-formation (Figure 5A and C). Absence of biofilm formation for the  $\Delta cstA$   
438 strain or the *CD630\_26020::erm* strain when pyruvate is the sole carbon source suggests  
439 that the CstA importer and the *CD630\_26020-CD630\_26010* TCS are primarily involved  
440 in the uptake and sensing of extracellular pyruvate, respectively. Biofilm formation by  
441 the  $\Delta ptsI$  strain indicates that the PTS system is not involved in pyruvate uptake.  
442 The ability of the  $\Delta cstA$  strain or the *CD630\_26020::erm* strain (Figure 6B) to form  
443 biofilms in the presence of glucose and pyruvate suggests that at least in the presence of  
444 glucose, CstA or *CD630\_26020-CD630\_26010* are not solely required for the uptake of  
445 pyruvate and that other importer(s) and/or regulatory mechanisms might be involved.  
446 In other bacteria, multiple proteins have been identified as pyruvate importers and  
447 expression of these importers are often controlled by the CCR regulatory network

448 (Charbonnier et al. 2017; van den Esker et al. 2017). In *C difficile*, CcpA is the major  
449 regulator of CCR, which controls the use of alternate carbon sources. In support of its  
450 role in controlling pyruvate metabolism, CcpA binds to the region upstream of *cstA*  
451 (Antunes et al. 2012). To test if the catabolic repression system was involved in  
452 pyruvate transport, we deleted *cstA* in our  $\Delta ccpA$  strain. The resulting double deletion  
453 strain ( $\Delta ccpA\Delta cstA$ ) was tested for its ability to form biofilms in CDMOBG supplemented  
454 with 50 mM pyruvate. The  $\Delta ccpA\Delta cstA$  strain did not form a biofilm whereas the  $\Delta ccpA$   
455 or  $\Delta cstA$  strains formed biofilms, although the amount of biofilm formed by the  $\Delta ccpA$   
456 strain was more variable (Figure 6B). These data support that extracellular pyruvate  
457 could also be imported by a second importer controlled by CcpA in the presence of  
458 glucose.

459 To test if extracellular pyruvate was used by the parental and deletion strains, pyruvate  
460 levels in the culture supernatant was measured from cells grown in CDMOB with 100  
461 mM pyruvate, CDMOBG or CDMOBG with 50 mM pyruvate for 24 h and 48 h. In  
462 CDMOBG, our assay did not detect significant changes in extracellular pyruvate  
463 concentration in the parental strains but the  $\Delta cstA$  strain accumulated 6 times more  
464 pyruvate in its supernatant (Figure 6C). This accumulation suggests that the  $\Delta cstA$  strain  
465 can excrete pyruvate in a CstA-independent manner. In CDMOB with 100 mM pyruvate,  
466 the  $\Delta cstA$  strain used approximately 50% of the pyruvate present in the growth medium  
467 but did not deplete pyruvate to the same extent as the parental strain (10% of starting  
468 concentration; Figure 6D). In CDMOBG with 50 mM pyruvate, the  $\Delta cstA$  and  $\Delta ccpA\Delta cstA$   
469 strains did not reduce the amount pyruvate to the levels of the parental or the  $\Delta ccpA$   
470 strains after 48h (Figure 6E). However, the  $\Delta cstA$  and the  $\Delta ccpA\Delta cstA$  strain were able to  
471 reduce the amount of pyruvate present in the growth medium. Interestingly, the  $\Delta ccpA$   
472 strain was able to use 90% of the pyruvate by 24h. The rapid depletion of pyruvate in

473 the  $\Delta ccpA$  strain compared to the parental strain and the reduction in the amount of  
474 extracellular pyruvate used by the  $\Delta ccpA\Delta cstA$  strain suggest that CstA, and not another  
475 importer, is highly active in the absence of CcpA. This is consistent with previous data  
476 showing that CcpA binds to the region upstream of *cstA* and supports the hypothesis  
477 that *cstA* expression is repressed by CcpA in the presence of glucose (Antunes et al ,  
478 2012).

479 The decrease in extracellular pyruvate in the absence of CstA suggests that pyruvate is  
480 also imported independently of CstA (Figure 6E). In other bacteria such as *Bacillus*  
481 *subtilis*, there are additional pyruvate importers encoded by *pftAB* that belong to the  
482 LrgAB holin anti-holin family. When these predicted holin anti-holin systems act as  
483 pyruvate importers, their coding genes are invariably located next to a TCS. While an  
484 *lrgAB*-family gene (~35% amino acid identity to PftB and no PftA homologs) exists in *C.*  
485 *difficile* strain 630, the genes are not associated with a TCS and were down-regulated at  
486 24 h in BHISG supplemented with DOC (Supplementary data), suggesting that this *lgrB*  
487 gene homolog is unlikely to encode the additional pyruvate importer in *C. difficile*.

488 In addition to the *lrgAB* homolog, we noted the presence of a second *cstA*-homolog  
489 encoded by *CD630\_23730*. This gene was highly expressed in *C. difficile* at 24 h in BHISG  
490 supplemented with DOC (Supplementary data); however, unlike *cstA* it is not located  
491 next to a TCS. It is possible that *CD630\_23730* is the importer responsible for the partial  
492 pyruvate uptake by the  $\Delta cstA$  and  $\Delta ccpA\Delta cstA$  strains when grown in CDMOBG with 50  
493 mM pyruvate (Figure 6D). This would be consistent with previous data showing that  
494 *CD630\_23730* is repressed by CcpA in TY medium, but not in TY medium supplemented  
495 with glucose (Antunes et al, 2012). The expression of additional pyruvate importers in  
496 the presence of preferred carbon sources, such as glucose are in agreement with our  
497 findings and those in other bacteria, such as *E. coli* (Ogasawara et al., 2019).

498 In the absence of glucose, our data indicate that pyruvate uptake leading to biofilm  
499 formation is dependent on CstA. However, in the presence of glucose, biofilm formation  
500 is dependent on glucose metabolism followed by a critical metabolic shift requiring  
501 pyruvate uptake by CstA and other importers. In support of this, we observed that the  
502  $\Delta ccpA\Delta cstA$  strain used the same amount of extracellular pyruvate as the parental strain  
503 after 24 h, but pyruvate uptake in the  $\Delta ccpA\Delta cstA$  strain was 5 times less (1-fold  
504 decrease in extracellular pyruvate) than the parental strain (5-fold decrease in  
505 extracellular pyruvate) between 24-48h (Figure 6E). This suggests the 24h-48h period is  
506 when the critical shift in metabolism occurs. In support, the  $\Delta ccpA$  and  $\Delta cstA$  that  
507 formed biofilms also had ~10-fold and ~2-3-fold decreases, respectively, in extracellular  
508 pyruvate levels between 24-48h. Taken together, active pyruvate uptake in stationary  
509 phase, a process that is partially CstA-dependent, drives a metabolic shift in *C. difficile*  
510 and leads to biofilm formation. These data confirm the importance of the role of  
511 pyruvate uptake in biofilm formation. This lifestyle switch can be driven by efficient  
512 pyruvate uptake and/or carbon metabolism.

## 513 Discussion

514 We previously identified DOC as an inducer of biofilm formation by *C. difficile*. DOC-  
515 induced biofilm took more than 24 h to form, suggesting the specific steps and  
516 pathways controlling the shift from planktonic to biofilm could be elucidated. In this  
517 study, our objectives were to identify and characterize key molecules and events  
518 required for DOC-induced biofilm formation. Using a combination of time-course  
519 transcriptomics and deletion strains, we identified several metabolic processes as a key  
520 drivers of DOC-induced biofilm formation. We also show that DOC-induced biofilm  
521 formation does not require quorum sensing and surface proteins previously associated  
522 with biofilm formation in the absence of DOC. However, the T4aP machinery encoded by  
523 the *pilA1* cluster is required for biofilm formation. Based on these findings and the  
524 analysis of culture supernatants, we demonstrated the importance of extracellular  
525 pyruvate and its integration for biofilm formation.

526 In some bacteria, pyruvate is known to be excreted during overflow metabolism  
527 (Tomlinson and Hochstein, 1972; Ruby and Nealson, 1977; Charbonnier et al. 2017; van  
528 den Esker et al. 2017). In our study, *C. difficile* is grown in BHISG and this medium  
529 provides an environment rich in proteins with an excess of glucose, which is suited for  
530 overflow metabolism (Sonenshein, 2007). Based on our transcriptomic analysis, DOC  
531 has a profound impact on metabolism-associated genes, specifically glycolysis  
532 (Supplementary Figure S2). The presence of DOC induces a metabolic stress that  
533 probably leads to overflow metabolism between inoculation and 14h, the excretion of  
534 pyruvate and, once glucose is exhausted, biofilm formation (see the proposed model in  
535 Figure 7). The mechanism by which pyruvate is excreted remains to be elucidated in  
536 bacteria and this appears to be independent of pyruvate importers (Gasperotti et al.,  
537 2020). Furthermore, the absence of the metabolic regulatory factors SigL, CcpA, and

538 CodY resulted in decreased biofilm formation as shown in this work, and Dubois et al.  
539 (2019). Specifically, these regulators are important to control flux between different  
540 metabolic pathways and help *C. difficile* transition to different sources of energy (Dineen  
541 et al, 2010; Antunes et al., 2012; Soutourina et al, 2020). Interestingly, the *sigL*  
542 inactivated strain was previously shown to require glucose for optimal growth and does  
543 not excrete pyruvate (Dubois et al., 2016; Soutourina et al, 2020). Given that the *sigL*  
544 inactivated strain did not form biofilm, this is consistent with our hypothesis that  
545 pyruvate excretion drives DOC-induced biofilm formation. Consumption of a preferred  
546 carbon source (e.g. glucose) is also important since a strain lacking *ptsI* was unable to  
547 form biofilms in the presence of glucose. In addition to glucose, other sugars used by *C.*  
548 *difficile* that require their own uptake systems, such as Neu5Ac and the NanEAT system,  
549 might also potentiate the metabolic shift required for biofilm formation. Taken together,  
550 our data indicate that in presence of DOC, *C. difficile* must control its metabolic activity  
551 to ensure overflow metabolism is activated to promote stationary phase survival and  
552 biofilm formation (Figure 7).

553 The importance of overflow metabolism and the excretion of pyruvate likely explain  
554 why casein hydrolysate supported biofilm formation whereas casamino acids and  
555 specific essential amino acids did not. Casein hydrolysate is a richer source of small  
556 peptides and amino acids than casamino acids or purified amino acids. This explains the  
557 additive effect of BCAA supplementation on biofilm formation as adding BCAAs may  
558 replace the BCAA synthesized as end-products of pyruvate metabolism. BCAAs are likely  
559 used in the oxidative Stickland reaction to produce energy during late stationary phase  
560 to promote biofilm formation. Overall, it appears that our semi-defined medium was  
561 optimized to support overflow metabolism and biofilm formation by *C. difficile*.



562 The key role of extracellular pyruvate for biofilm formation is not limited to *C. difficile*.  
563 Recently, it was demonstrated that *Staphylococcus aureus* requires the presence of  
564 extracellular pyruvate to form and maintain a biofilm (Goodwine et al., 2019). In  
565 *Streptococcus mutans*, pyruvate improves stationary phase survival and protects against  
566 microbiota-generated oxidative stresses in a density- and CcpA-dependent fashion (Ahn  
567 et al., 2019; Ishkov et al., 2020; Redanz et al., 2020). Furthermore, pyruvate  
568 fermentation is important for *Pseudomonas aeruginosa* microcolony formation and long-  
569 term survival in anaerobic environments (Eschbach et al., 2004; Petrova et al. 2012). In  
570 this case, lactate is oxidized to pyruvate by the cells in the oxygen-rich top layer of the  
571 biofilm and the secreted pyruvate is then converted to acetate by the cells in the anoxic  
572 lower layers (Eschbach et al., 2004; Petrova et al. 2012). This metabolic cooperation  
573 within the biofilm community is crucial, as it provides a means for the cells to produce  
574 enough ATP to survive, but not grow, in the nutrient poor environment of the deep layer  
575 of the biofilm (Stewart et al. 2019). Unlike *P. aeruginosa*, *B. subtilis* uses a lactate to  
576 promote optimal biofilm formation (Chai et al. 2009). However, *C. difficile* is a strict  
577 anaerobe and does not need to switch from an aerobic based metabolism to an  
578 anaerobic-based metabolism. We must consider that the cells in the deep layers of the  
579 biofilm have limited resources. Our transcriptomic analysis supports that biofilm cells  
580 reprioritise their metabolism, as we observed major shifts in the expression of several  
581 genes associated with metabolic pathways at 48 h. In our transcriptional analysis, genes  
582 associated with fermentation were up-regulated (Figure 2) at 24 h but not 48 h. We also  
583 found evidence that butyric acid and lactic acid production occurs between 24 h and 48  
584 h (Supplementary Figure S6B). Therefore, *C. difficile* probably starts using extracellular  
585 pyruvate after 24 h of incubation, which helps long-term survival of the cells during  
586 stationary phase. In support of this, *Haemophilus influenzae* uses pyruvate as a pivotal

587 point in metabolic adaptation for biofilm cells (Harrison et al., 2019). This  
588 reprioritization is critical for metabolic adaptation and long-term survival of biofilm  
589 cells.

590 A recent study provides some interesting insight into biofilm formation that is  
591 dependent on eDNA (Yu et al. 2018). In this study, sub-inhibitory concentrations of  
592 antibiotics that target the cell envelope enhance biofilm formation by increasing the  
593 amount of DNA release from lysing cells without affecting the overall viability of the  
594 population. From their data, the authors build a mathematical model that accounts for  
595 cell lysis and death, viability, growth and aggregation or binding provided by eDNA.

596 Using this model, we can understand the importance of metabolism in the induction of  
597 biofilm in the presence of DOC or pyruvate given that the DOC-induced biofilm formed  
598 by *C. difficile* is eDNA-dependent (Dubois et al., 2019). In our proposed model,  
599 extracellular pyruvate improves long term viability of *C. difficile* during stationary phase  
600 which compensates for autolysis (Figure 7). As DNA is released by lysis, viable cells start  
601 aggregating, which may involve the T4aP, as time passes, the biomass increases and *C.*  
602 *difficile* adapts its metabolism to this sedentary lifestyle. Overall, our growth conditions  
603 allow *C. difficile* to pass the “biofilm threshold” and any disturbance to the metabolism  
604 (SigL, CcpA, CodY, PtsI), lysis (Cwp19), binding or aggregation (eDNA, T4aP) would  
605 prevent *C. difficile* from crossing this threshold (Figure 7).

606 Extracellular pyruvate is also produced by the gut microbiota and provides protection  
607 against colonization by *Salmonella* (Morita et al. 2019). In this case, pyruvate  
608 concentrations were higher in the luminal content of specific pathogen free (SPF) mice  
609 than those of germ-free mice or SPF mice treated with oral vancomycin or neomycin.

610 Furthermore, colonization by the gut commensal bacterium *Lactobacillus helveticus*,  
611 which excretes high concentrations of pyruvate *in vitro*, increased pyruvate

612 concentrations in SPF mice. Therefore, it is possible that *C. difficile* encounters  
613 extracellular pyruvate during colonization of the intestinal tract containing a normal  
614 microbiota or when the microbiota is restored after antibiotic therapy.  
615 Depending on the composition of the microbiota, *C. difficile* could encounter favourable  
616 conditions that would include sub-inhibitory concentrations of DOC, and availability of  
617 specific amino acids, mucus-derived sugars, and pyruvate (Abbas and Zackular, 2020;  
618 Girinathan et al., 2020; Pereira et al., 2020). Under these favourable conditions, sub-  
619 inhibitory concentration of DOC would trigger a metabolic adaptation in *C. difficile* to use  
620 the available metabolites produced by the microbiota. Interestingly, the molecules that  
621 trigger biofilm formation also repress sporulation (DOC; Dubois et al 2019) and toxin  
622 production (DOC and pyruvate; Dubois et al. 2016; 2019). Overall, conditions that are  
623 favourable for long-term colonization and biofilm formation promote *C. difficile*  
624 persistence rather than sporulation or virulence. Any disturbance to this balance, such  
625 as the disappearance of inhibitory molecules (e.g. DOC), increase nutrient availability  
626 and change in SCFA profiles, could trigger blooms of *C. difficile* as observed recently  
627 (VanInsberghe et al. 2020). Furthermore, other signals, such as change in amino acids  
628 availability or increase SCFA production, could prevent *C. difficile* from entering a  
629 biofilm or persistence state and promote sporulation. These hypotheses are supported  
630 by recent *in silico* modeling of the metabolism in the context of sporulation and  
631 virulence where each context has distinct metabolic intake and efflux (Jenior et al.,  
632 2020).

633 In summary, we have identified key determinants of DOC-induced biofilm by *C. difficile*.  
634 These determinants are unique to DOC-induced biofilm formation suggesting a distinct  
635 mechanism. These includes regulator of lifestyle and metabolism and T4aP but the most  
636 interesting finding is the importance of extracellular pyruvate and its integration in

637 promoting biofilm formation. Early in our growth conditions (before 14h), pyruvate is  
638 probably excreted as a result of overflow metabolism and, as *C. difficile* progresses from  
639 exponential to stationary phase, extracellular pyruvate is imported using CstA and other  
640 pyruvate importers (Figure 7). This prevents rapid cell death and allows *C. difficile* to  
641 generate eDNA through autolysis and pass the “biofilm threshold”. Interestingly,  
642 extracellular pyruvate is produced in the gut by commensal bacteria and this could act  
643 as a source of pyruvate for *C. difficile*. In conclusion, extracellular pyruvate in the  
644 presence of other microbial metabolite could act as a key molecule driving *C. difficile*  
645 persistence in the intestinal tract or in response to DOC.

646

## 647 **Methods**

648 **Bacterial Strains and culture conditions.** Bacterial strains and plasmids used in this  
649 study are listed in Supplementary Table 3. *E. coli* strains were grown in LB broth with  
650 chloramphenicol (15 µg/ml). *C. difficile* strains were grown anaerobically (5% H<sub>2</sub>, 5%  
651 CO<sub>2</sub>, 90% N<sub>2</sub>) in BHISG (BHI supplement with 0.5% (w/v) yeast extract, 0.01mg/mL  
652 cysteine and 100 mM glucose). Additionally, 10 ng/ml of anhydrotetracycline (Atc) was  
653 used to induce the *P<sub>tet</sub>* promoter of pRPF185 vector derivatives in *C. difficile*.

654 The final composition of CDMOB is as follow: Oxoid casein hydrolysate (10 mg/mL), L-  
655 Tryptophane (0.5 mg/mL), L-Cysteine (0.01 mg/mL), L-Leucine (0.0033 mg/mL), L-  
656 Isoleucine 0.0033 mg/mL), L-Valine (0.0033 mg/mL), Na<sub>2</sub>HPO<sub>4</sub> (5 mg/mL), NaHCO<sub>3</sub> (5  
657 mg/mL), KH<sub>2</sub>PO<sub>4</sub> (0.9 mg/mL) NaCl (0.9 mg/mL), (NH<sub>4</sub>)<sub>2</sub>SO<sub>4</sub> (0.04 mg/mL), CaCl<sub>2</sub>·2H<sub>2</sub>O  
658 0,026 MgCl<sub>2</sub>·6H<sub>2</sub>O (0,02 mg/mL), MnCl<sub>2</sub>·4H<sub>2</sub>O (0,01 mg/mL), CoCl<sub>2</sub>·6H<sub>2</sub>O (0.001  
659 mg/mL) FeSO<sub>4</sub>·7 H<sub>2</sub>O (0.004 mg/mL) D-biotine (0.001 mg/mL), calcium-D-  
660 panthothenate (0.001 mg/mL) and pyridoxine (0.0001 mg/mL). The desired sugars  
661 and/or DOC were added, as necessary.

662

663 **Biofilm assays.** Overnight cultures of *C. difficile* were diluted 1/100 into the desired  
664 medium (BHIS or CDMOB) containing the desired supplements (100 mM glucose, 240  
665 DOC and/or 50 mM or 100 mM sodium pyruvate) and 1 ml of the dilution was aliquoted  
666 in each well of a 24-well polystyrene tissue culture-treated plates (Costar, USA). Plates  
667 were incubated at 37°C in an anaerobic environment for 48h. Biofilm biomass was  
668 measured using established methods (Dubois et al 2019). Briefly, spent media was  
669 removed by inverting the plate and wells were washed twice by pipetting phosphate-  
670 buffered saline (PBS) at 45° angle. Biofilms were air dried and stained with crystal violet  
671 (CV; 0.2% w/v) for 2 min. CV was removed by inversion; wells were washed twice with

672 PBS then air-dried. Dye bound to the biofilm biomass was solubilized by adding 1 ml of a  
673 75% ethanol solution and the absorbance, corresponding to the biofilm biomass, was  
674 measured at a  $\lambda_{600\text{nm}}$  with a plate reader (Promega GloMax Explorer). Sterile medium  
675 was used as a negative control and a blank for the assays.

676

677 **RNA isolation and quantitative reverse-transcriptase PCR.** A 24-well plate was  
678 used to produce one replicate for one condition. At 9 h, 14 h and 24 h, the total  
679 bacterial population was collected, and cells were harvested by centrifugation (10 min,  
680  $4000 \times g$ ,  $4^{\circ}\text{C}$ ). The pellet was frozen ( $-80^{\circ}\text{C}$ ) until used. For the 48h biofilm sample, the  
681 supernatant was removed by inverting the plate, the biofilm was washed twice and  
682 resuspended in 20 mL of PBS. The recovered biofilm cells were centrifuged and the  
683 pellet was frozen until RNA was extracted. Total RNA was extracted from cell pellets as  
684 previously described (Saujet et al. 2013). cDNA synthesis and qRT-PCR were carried as  
685 described before (Saujet et al. 2013) using primers listed in Supplementary Table 4.

686

687 **Whole transcriptome sequencing and analysis.** Transcriptomic analysis for each  
688 condition was performed using 3 independent RNA preparations using methods  
689 described before (Dubois et al., 2019). Briefly, the RNA samples were first treated  
690 using Epicenter Bacterial Ribo-Zero kit. This depleted rRNA fraction was used to  
691 construct cDNA libraries using TruSeq Stranded Total RNA sample prep kit (Illumina).  
692 Libraries were then sequenced by Illumina HiSeq2500 sequencer. Cleaned sequences  
693 were aligned to the reannotated *C. difficile* strain 630 (Monot et al., 2011) for the  
694 mapping of the sequences using Bowtie 2 (Version 2.1.0). DEseq2 (version 1.8.3) was  
695 used to perform normalization and differential analysis using the 9h time point values

696 as a reference for reporting the expression data of the 14 h, 24 h and 48 h. Genes were  
697 considered differentially expressed if the fold changes were  $\geq \text{Log}_2 1.5$  and their  
698 adjusted p-value was  $\leq 0.05$ .

699

700 **Gene deletion inactivation and complementation in *C. difficile*.** Gene deletions  
701 were carried as described in Peltier et al (2020). Briefly, regions upstream and  
702 downstream of the gene of interest were PCR-amplified using primer pairs listed in  
703 Supplementary Table 4. PCR fragments and linearized pDIA6754 (Peltier et al. 2020)  
704 were then mixed and assembled using IVA cloning (García-Nafria et al. 2015) or Gibson  
705 assembly and transformed by heat shock into *E. coli* NEB 10 $\beta$ . Constructions were  
706 verified by sequencing and the selected plasmid were introduced into *E. coli* HB101  
707 (RP4). Plasmids were transferred by conjugation into the desired *C. difficile* strains and  
708 deletion mutants were obtained using counter-selection described elsewhere (Peltier  
709 et al., 2020).

710 To complement the *ptsI*-deletion strain, the *ptsI* gene with its RBS was PCR amplified  
711 using appropriate primers (Supplementary Table 4) and inserted into the *SacI* and  
712 *BamHI* restriction sites of pRPF185 (Soutourina et al. 2013) using IVA cloning to  
713 generate plasmid pDIA6996. To complement the *cdsB* deletion strain, *cdsB* and its  
714 promoter were amplified by PCR using the primers listed in Supplementary Table 4  
715 and inserted in the restriction site *BamHI* and *XhoI* of pMTL84121 (Heap et al. 2009)  
716 using IVA cloning to generate plasmid pDIA6997. Both plasmids were then transferred  
717 by conjugation into the desired strains, yielding strains CDIP1169 and CDIP1170  
718 respectively.

719

720 **Enzymatic dispersion of biofilms.** Biofilm dispersion experiments were performed as  
721 described previously (Dubois et al. 2019). Briefly, biofilms were grown in CDMOBG  
722 with 240  $\mu$ M DOC as described above and, after 48 h, 50  $\mu$ l of a DNase I solution (500  
723  $\mu$ g/ml in water), 50  $\mu$ l of a proteinase K solution (500  $\mu$ g/ml in water) or 50  $\mu$ l of fresh  
724 800 mM NaIO<sub>4</sub> in water (for a final concentration of 40 mM) was added directly to the  
725 biofilms. Control wells were treated with 50  $\mu$ l water. Wells were treated under  
726 anaerobic conditions at 37°C for 1h with DNase I and proteinase K or for 2h with  
727 NaIO<sub>4</sub>. Biofilms were then washed, stained, and quantified as described above.

728

729 **Biofilm matrix analysis:** The biofilm matrix was harvested and purified as described  
730 previously (Dubois et al. 2019). Briefly, biofilms were grown as described above,  
731 washed twice with PBS and resuspended in 1.5 M NaCl (12 wells/mL). The biofilm  
732 suspension was then centrifuged (8 000  $\times$  g for 10 min) and the supernatant was  
733 collected and stored at -20°C. A fraction of the matrix was then treated with DNase I  
734 (25  $\mu$ g) and Proteinase K (25  $\mu$ g) for 1 h at 37°C. Samples were then analysed by  
735 agarose gel electrophoresis or SDS-PAGE. DNA was stained with ethidium bromide,  
736 proteins with Coomassie blue, and glycol-proteins and the DNase/Proteinase K treated  
737 matrix samples with the Pro-Q Emerald 300 glycoprotein stain (ThermoFisher).

738

739 **Gas Phase Chromatography:** *C. difficile* 630 $\Delta$ erm was grown in BHISG or BHISG  
740 supplemented with 240  $\mu$ M DOC in 24 well plates. After 24 h or 48 h, 12 mL of culture  
741 was recovered and cells were removed by centrifugation (10 min, 4000  $\times$  g, 4°C). The  
742 supernatants were recovered and stored at -20°C for future use. Volatile and non-  
743 volatile fatty acids composition was determined and quantified using a Gas



744 Chromatograph (Model CP3380, Varian Inc., United States) as previously described  
745 (Carlier and Sellier, 1989). For control purposes, sterile medium was used to  
746 determine the initial composition of the fatty acids in the medium.

747

748 **Treatment with pyruvate dehydrogenase.** The pyruvate depletion assay was  
749 adapted from Goodwine et al. (2019). Briefly, biofilms were prepared in CDMOBG with  
750 240  $\mu\text{M}$  DOC as described above. After 24 h, 250  $\mu\text{L}$  containing 20 mU of pyruvate  
751 dehydrogenase and cofactors (2mM CoA, 2 mM  $\beta\text{-NAD}^+$ , 20  $\mu\text{M}$  thiamine  
752 pyrophosphate and 50  $\mu\text{M}$   $\text{MgSO}_4$ ) was added to the biofilm. For control purposes,  
753 pyruvate dehydrogenase was heat inactivated at 100°C for 10 min and mixed with its  
754 cofactors. A cofactor-only control and a non-treated control were also included. The  
755 values are reported as a percent of the biofilm formed using the following formula:  
756  $(\text{Treated biofilm (Enzyme, heat-inactivated enzyme or buffer only)}/\text{untreated biofilm})$   
757  $\times 100$ .

758

759 **Quantification of pyruvate in culture supernatant:** *C. difficile* strains were grown in  
760 1mL of CDMOB with 100 mM pyruvate or CDMOBG with 50 mM pyruvate aliquoted in  
761 individual wells of a 24-well plate. After 24 h and 48 h, 1 mL of each sample was  
762 recovered and the supernatant was recovered by centrifugation (1 min, 14000  $\times$  g).  
763 The clarified supernatant was transferred to a new tube and stored -20°C until used.  
764 Sterile medium was used as a control to quantify the amount of pyruvate at time 0 h.  
765 Pyruvate was quantified using the EnzyChrom™ Pyruvate Assay kit (BioAssay  
766 Systems). The values are reported as a percent of the pyruvate remaining in the  
767 supernatant calculated with the following formula: (Concentration of pyruvate in

768 culture supernatant/Concentration of pyruvate in sterile medium)  $\times$  100.

769

770 **Statistical analysis.** Biofilm assays, effect of treatment and effect of genetic inactivation  
771 or deletion were analysed using a Kruskal-Wallis test followed by an uncorrected Dunn's  
772 test. Effect of pyruvate supplementation was compared and analysed using a two-way  
773 ANOVA followed by a Fisher LSD test.

774

#### 775 **Data Availability**

776 RNA-Seq data generated in this study are available in the NCBI-GEO with accession no  
777 GSE165116.

778 Other data that support the findings of this study are available from the corresponding  
779 author upon reasonable request.

780

#### 781 **Acknowledgements**

782 We would like to thank Johann Peltier, Imane El Meouche and Laurent Bouillaut for  
783 generously providing the CDIP634, *fliC::erm*, *rex::erm* and *prdB::erm* strains. This work  
784 was funded by the Institut Pasteur and the "Integrative Biology of Emerging Infectious  
785 Diseases" (LabEX IBEID) funded in the framework of the French Government's  
786 "Programme Investissements d'Avenir". YDNT postdoctoral fellowship was funded by  
787 the LabEX IBEID.

788

#### 789 **Competing Interests**

790 The authors declare that there are no competing interests.

791

792 **Author Contribution**

793 YDNT, IMV and BD participated in the study design; YDNT, BARD, AH and MO performed  
794 experiments; MM provided assistance with the transcriptomic experimental design and  
795 analysis; YDNT and BD drafted and edited the manuscript; all authors read and  
796 approved the final manuscript.

797

798 **References**

- 799 1. Crobach MJT, et al. Understanding *Clostridium difficile* colonization. *Clin. Microbiol.*  
800 *Rev.* **31**, pii: e00021-17 (2018).
- 801 2. Lim S.C., Knight D.R., Riley T.V. *Clostridium difficile* and One Health. *Clin. Microbiol.*  
802 *Infect.* **26**, 857-863 (2020).
- 803 3. Abbas A, Zackular JP. Microbe-microbe interactions during *Clostridioides difficile*  
804 infection. *Curr. Opin. Microbiol.* **53**, 19-25 (2020)
- 805 4. Ghimire S, et al. Identification of *Clostridioides difficile* inhibiting gut commensals  
806 using culturomics, phenotyping, and combinatorial community assembly. *mSystems*  
807 **5**, e00620-19 (2020)
- 808 5. BP Girinathan, et al. The mechanisms of *in vivo* commensal control of *Clostridioides*  
809 *difficile* virulence. *bioRxiv* 2020.01.04.894915 (2020)
- 810 6. Solbach P, et al. *baiCD* gene cluster abundance is negatively correlated with  
811 *Clostridium difficile* infection. *PLoS One* **13**:e0196977. (2020)
- 812 7. Studer N, et al. Functional intestinal bile acid 7 $\alpha$ -dehydroxylation by *Clostridium*  
813 *scindens* associated with protection from *Clostridium difficile* infection in a  
814 gnotobiotic mouse model. *Front Cell Infect Microbiol.* **6**, 191 (2016)
- 815 8. Buffie CG, et al.. Precision microbiome reconstitution restores bile acid mediated  
816 resistance to *Clostridium difficile*. *Nature* **517**, 205 (2015).
- 817 9. McDonald JAK, et al. Inhibiting growth of *Clostridioides difficile* by restoring valerate,  
818 produced by the intestinal microbiota. *Gastroenterology* **155**, 1495 (2018)
- 819 10. Seekatz AM, et al. Restoration of short chain fatty acid and bile acid metabolism  
820 following fecal microbiota transplantation in patients with recurrent *Clostridium*  
821 *difficile* infection. *Anaerobe* **53**, 64 (2018).

- 822 11. Pereira, F.C., et al. Rational design of a microbial consortium of mucosal sugar utilizers  
823 reduces *Clostridiodes difficile* colonization. *Nat. Commun.* **11**, 5104 (2020).
- 824 12. Deakin LJ, et al. The *Clostridium difficile* spo0A gene is a persistence and transmission  
825 factor. *Infect Immun.* **80**, 2704 (2012)
- 826 13. Pettit, L.J., et al. Functional genomics reveals that *Clostridium difficile* Spo0A  
827 coordinates sporulation, virulence and metabolism. *BMC Genomics.* **15**, 160 (2014).
- 828 14. Dawson, L.F., et al. Characterisation of *Clostridium difficile* biofilm formation, a role  
829 for Spo0A. *PLoS One.* **7**, e50527 (2012).
- 830 15. Donelli, G., et al. Biofilm-growing intestinal anaerobic bacteria. *FEMS Immunol. Med.*  
831 *Microbiol.* **65**, 318-325 (2012).
- 832 16. Crowther, G.S., et al. Comparison of planktonic and biofilm-associated communities  
833 of *Clostridium difficile* and indigenous gut microbiota in a triple-stage chemostat gut  
834 model. *J. Antimicrob. Chemother.* **69**, 2137-2147 (2014).
- 835 17. Semenyuk, E.G., et al. Analysis of Bacterial Communities during *Clostridium difficile*  
836 Infection in the Mouse. *Infect. Immun.* **83**, 4383-4391 (2015).
- 837 18. Dubois T, et al. 2019. A microbiota-generated bile salt induces biofilm formation in  
838 *Clostridium difficile*. *npj Biofilms Microbiomes* **5**, 14 (2019).
- 839 19. Hall-Stoodley, L., Costerton, J.W. & Stoodley, P. Bacterial biofilms: from the natural  
840 environment to infectious diseases. *Nature Rev. Microbiol.* **2**, 95–108 (2004).
- 841 20. Đapa, T., et al. Multiple factors modulate biofilm formation by the anaerobic pathogen  
842 *Clostridium difficile*. *J. Bacteriol.* **195**, 545-555 (2013).
- 843 21. Soutourina, O.A., et al. Genome-wide identification of regulatory RNAs in the human  
844 pathogen *Clostridium difficile*. *PLoS Genet.* **9**, e1003493 (2013).
- 845 22. Boudry, P., et al. Pleiotropic role of the RNA chaperone protein Hfq in the human  
846 pathogen *Clostridium difficile*. *J. Bacteriol.* **196**, 3234-3248 (2014).

- 847 23. Pantaléon, V., et al. The *Clostridium difficile* Protease Cwp84 Modulates both Biofilm  
848 Formation and Cell-Surface Properties. *PLoS One*. **10**, e0124971 (2015).
- 849 24. Walter, B.M., et al. The SOS response master regulator LexA is associated with  
850 sporulation, motility and biofilm formation in *Clostridium difficile*. *PLoS One*. **10**,  
851 e0144763 (2015).
- 852 25. Maldarelli GA, et al. Type IV pili promote early biofilm formation by *Clostridium*  
853 *difficile*. *Pathog. Dis.* Aug;**74**, pii: ftw061 (2016)
- 854 26. Vuotto, et al. Subinhibitory concentrations of metronidazole increase biofilm  
855 formation in *Clostridium difficile* strains. *Pathog. Dis.* **74**, pii: ftv114 (2016).
- 856 27. Nawrocki KL, et al. Ethanolamine is a valuable nutrient source that impacts  
857 *Clostridium difficile* pathogenesis. *Environ. Microbiol.* **20**, 1419-1435. (2018)
- 858 28. Hofmann JD, et al. Metabolic Reprogramming of *Clostridioides difficile* during the  
859 stationary phase with the induction of toxin production. *Front. Microbiol.* **9**, 1970  
860 (2018)
- 861 29. Saujet L, et al.. The key sigma factor of transition phase, SigH, controls sporulation,  
862 metabolism, and virulence factor expression in *Clostridium difficile*. *J Bacteriol.* **193**,  
863 3186-3196 (2011)
- 864 30. Girinathan BP, et al. Pleiotropic roles of *Clostridium difficile* *sin* locus. *PLoS Pathog* **14**,  
865 e1006940 (2018)
- 866 31. Poquet I, et al. *Clostridium difficile* biofilm: remodeling metabolism and cell surface to  
867 build a sparse and heterogeneously aggregated architecture. *Front. Microbiol.* **9**, 2084  
868 (2018)
- 869 32. Cartman ST, & Minton NP. A mariner-based transposon system for *in vivo* random  
870 mutagenesis of *Clostridium difficile*. *Appl. Environ. Microbiol.* **76**, 1103-1109 (2010)

- 871 33. Ng, K., et al. Microbiota-liberated host sugars facilitate post-antibiotic expansion of  
872 enteric pathogens. *Nature* **502**, 96–99 (2013)
- 873 34. Dubois T, et al. Control of *Clostridium difficile* physiopathology in response to cysteine  
874 availability. *Infect. Immun.* **84**, 2389-3405 (2016)
- 875 35. Hwang S, et al. Peptide Transporter CstA Imports Pyruvate in *Escherichia coli* K-12. *J.*  
876 *Bacteriol.* **200**, pii: e00771-17 (2018)
- 877 36. Antunes, A., et al. Global transcriptional control by glucose and carbon regulator CcpA  
878 in *Clostridium difficile*. *Nucleic Acids Res.* **40**, 10701-10718 (2012).
- 879 37. Ogawara, H., et al. Regulatory role of pyruvate-sensing BtsSR in biofilm formation by  
880 *Escherichia coli* K-12. *FEMS Microbiol. Letters* 366, fnz251 (2019)
- 881 38. Tomlinson, G.A. & Hochstein, L.I. Studies on acid production during carbohydrate  
882 metabolism by extremely halophilic bacteria. *Can. J. Microbiol.* **18**, 1973–1976 (1972)
- 883 39. Ruby, E.G. & Nealson, K.H. Pyruvate production and excretion by the luminous marine  
884 bacteria. *Appl. Envir. Microbiol.* **34**: 164–169 (1977)
- 885 40. Charbonnier T, et al. Molecular and physiological logics of the pyruvate-induced  
886 response of a novel transporter in *Bacillus subtilis*. *mBio.* **8**, pii: e00976-17 (2017)
- 887 41. van den Esker MH, Kovács ÁT, Kuipers OP. YsbA and LytST are essential for pyruvate  
888 utilization in *Bacillus subtilis*. *Environ Microbiol.* **19**, 83-94. (2017)
- 889 42. Sonenshein AL. Control of key metabolic intersections in *Bacillus subtilis*. *Nat. Rev.*  
890 *Microbiol.* **5**, 917-27 (2007)
- 891 43. Gasperotti, A, et al. Function and Regulation of the Pyruvate Transporter CstA in  
892 *Escherichia coli*. *Int. J. Mol. Sci.* **21**, 9068 (2020)
- 893 44. Dineen, SS, McBride, SM, Sonenshein AL. Integration of metabolism and virulence by  
894 *Clostridium difficile* CodY. *J Bacteriol.* **192**, 5350–5362 (2010)

- 895 45. Soutourina, O, et al, Genome-wide transcription start site mapping and promoter  
896 assignments to a sigma factor in the human enteropathogen *Clostridioides difficile*  
897 *Front Microbiol.* **11**, 1939 (2020)
- 898 46. Goodwine, J., et al. Pyruvate-depleting conditions induce biofilm dispersion and  
899 enhance the efficacy of antibiotics in killing biofilms in vitro and in vivo. *Sci. Rep.* **9**,  
900 3763 (2019)
- 901 47. Ahn, S., et al. Characterization of LrgAB as a stationary phase-specific pyruvate uptake  
902 system in *Streptococcus mutans*. *BMC Microbiol.* **19**, 223 (2019)
- 903 48. Ishkov IP, et al. Environmental Triggers of *lrgA* Expression in *Streptococcus mutans*.  
904 *Front. Microbiol.* **11**, 18. (2020)
- 905 49. Redanz, S., et al. Pyruvate secretion by oral streptococci modulates hydrogen  
906 peroxide dependent antagonism. *ISME J*, **14**,1074-1088 (2020).
- 907 50. Eschbach M, et al. Long-term anaerobic survival of the opportunistic pathogen  
908 *Pseudomonas aeruginosa* via pyruvate fermentation. *J. Bacteriol.* **186**, 4596-5604  
909 (2004)
- 910 51. Petrova OE, et al. Microcolony formation by the opportunistic pathogen *Pseudomonas*  
911 *aeruginosa* requires pyruvate and pyruvate fermentation. *Mol. Microbiol.* **86**, 819-835  
912 (2012)
- 913 52. Stewart PS, et al. Conceptual model of biofilm antibiotic tolerance that integrates  
914 phenomena of diffusion, metabolism, gene expression, and physiology. *J. Bacteriol.*  
915 **201**, e00307-19 (2019)
- 916 53. Chai Y, Kolter R, & Losick R. A widely conserved gene cluster required for lactate  
917 utilization in *Bacillus subtilis* and its involvement in biofilm formation. *J Bacteriol.*  
918 **191**, 2423-2430 (2009)



- 919 54. Harrison, A., et al. Reprioritization of biofilm metabolism is associated with nutrient  
920 adaptation and long-term survival of *Haemophilus influenzae*. *npj Biofilms*  
921 *Microbiomes* **5**, 33 (2019)
- 922 55. Yu W, Hallinen KM, & Wood KB.. Interplay between antibiotic efficacy and drug-  
923 induced lysis underlies enhanced biofilm formation at subinhibitory drug  
924 concentrations. *Antimicrob. Agents Chemother.* **62**, e01603-17 (2018)
- 925 56. Morita N, et al. GPR31-dependent dendrite protrusion of intestinal CX3CR1(+) cells  
926 by bacterial metabolites. *Nature* **566**,110-114. (2019)
- 927 57. VanInsberghe, D., et al. Diarrhoeal events can trigger long-term *Clostridium difficile*  
928 colonization with recurrent blooms. *Nat. Microbiol.* **5**, 642-650 (2020).
- 929 58. Jenior, ML, et al. Genome-scale metabolic reconstruction analysis of *Clostridioides*  
930 *difficile* identifies conserved patterns of virulence-related metabolic reprogramming.  
931 *bioRxiv*, 2020.11.09.373480 (2020)
- 932 59. Saujet, L., et al. Genome-wide analysis of cell type-specific gene transcription during  
933 spore formation in *Clostridium difficile*. *PLoS Genet.* **9**, e1003756 (2013).
- 934 60. Monot, M, et al. Reannotation of the genome sequence of *Clostridium difficile* strain  
935 630. *J. Med. Microbiol.* **60**, 1193-1199. (2011)
- 936 61. Peltier, J, et al. Type I toxin-antitoxin systems contribute to the maintenance of mobile  
937 genetic elements in *Clostridioides difficile*. *Commun Biol.* **718** (2020)
- 938 62. García-Nafría, J., Watson, J. & Greger, I. IVA cloning: A single-tube universal cloning  
939 system exploiting bacterial In Vivo Assembly. *Sci. Rep.* **6**, 27459 (2016).
- 940 63. Heap JT, et al. A modular system for *Clostridium* shuttle plasmids. *J. Microbiol. Methods*  
941 **78**, 79-85 (2009)

- 942 64. Carlier JP, & Sellier N. Gas chromatographic-mass spectral studies after methylation  
943 of metabolites produced by some anaerobic bacteria in spent media. *J. Chromatogr.*  
944 **493**, 257-273 (1989)

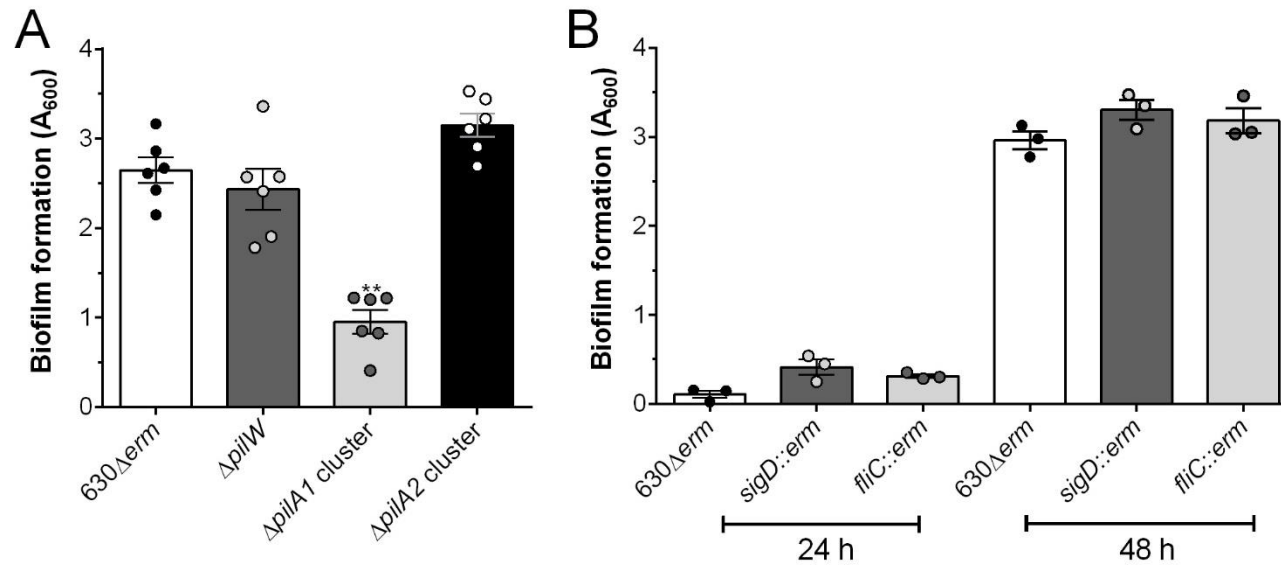

**Figure 1: The T4aP machinery is required for biofilm formation in BHISG supplement with DOC.** Biofilm formation was assessed in strains lacking genes (A) encoding pili (48h), (B) or involved in flagella motility (24h and 48h). Asterisks indicate statistical significance determined with a Kruskal-Wallis test followed by an uncorrected Dunn's test (\*\*  $p \leq 0.01$ , vs 630 $\Delta$ erm). Data shown indicate biological replicates from experiment performed on different days, the bars represent the mean and the error bars represent the SEM.

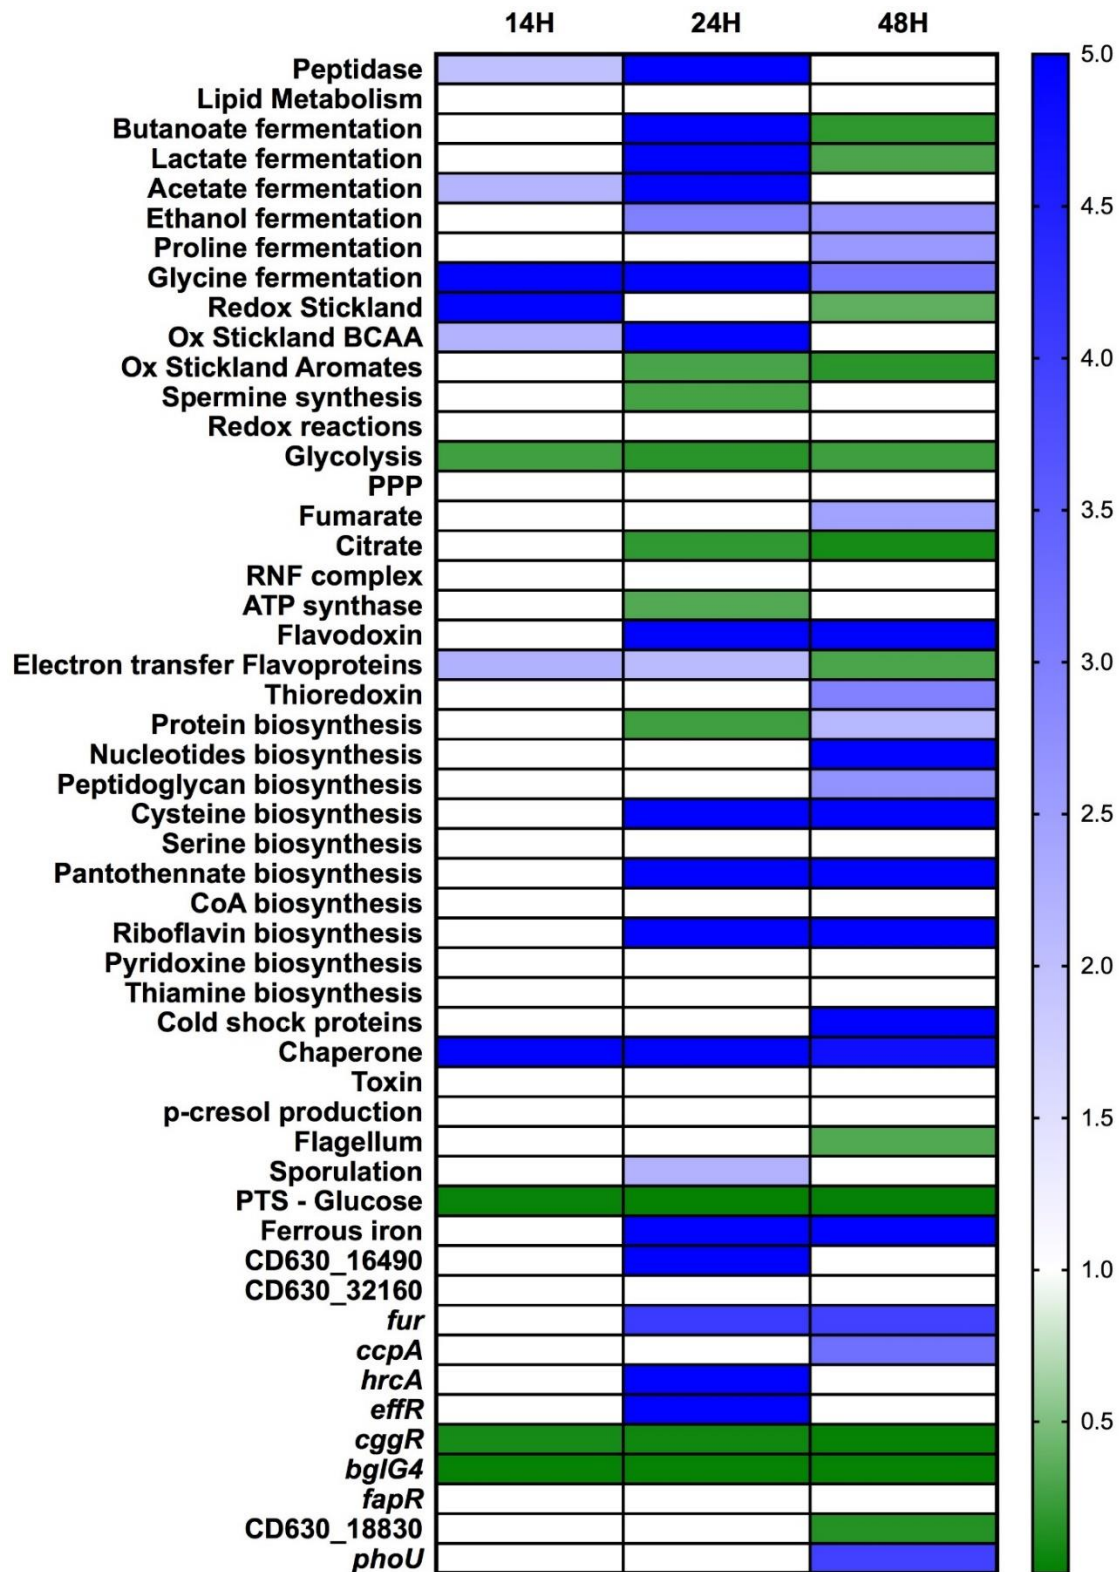

**Figure 2:** Overview of transcriptomic changes over time in genes previously associated with stationary phase in *C. difficile* strain 630 $\Delta$ *erm* grown in BHISG supplemented with 240

$\mu\text{M}$  DOC. Changes in expression over time are colour coded (in white, no changes; blue, up-regulated; or green, down-regulated). The 9 h time point was used as the reference point to measure gene expression. Data used to generate the figure are available in the Supplementary data file

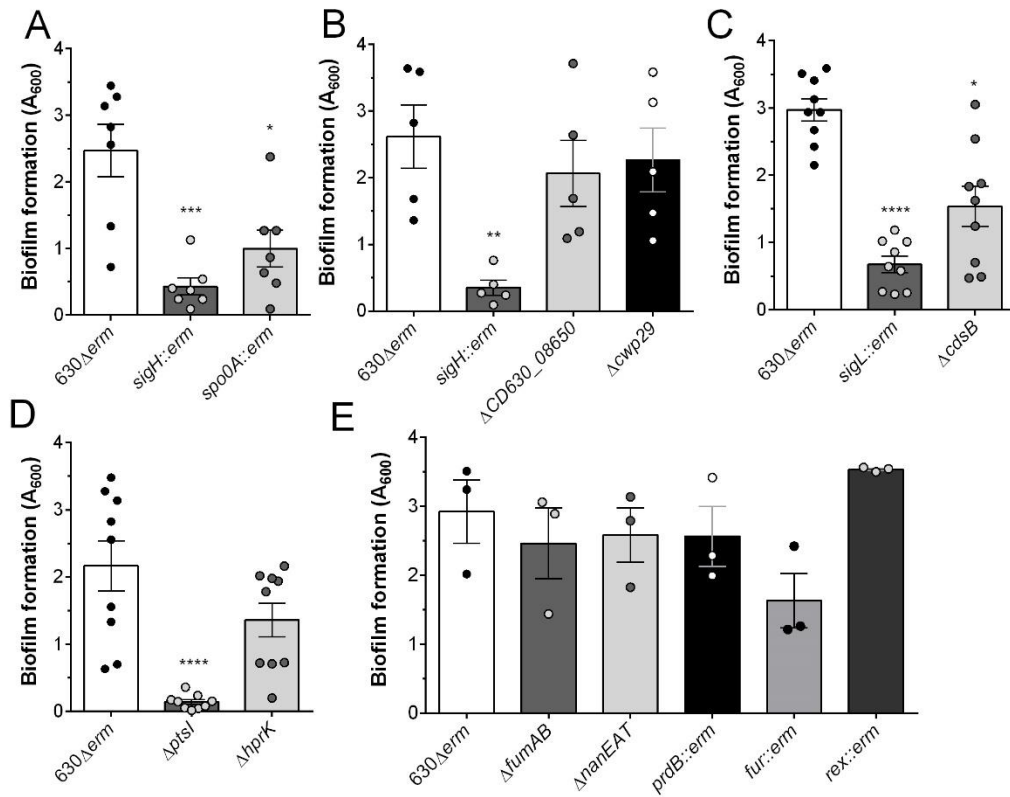

**Figure 3: Biofilm formation in BHISG supplement with DOC is dependent on SigH, SigL and PTS transport.** Biofilm formation was assessed 48h after inoculation in strains lacking genes involved in (A) the transition to stationary phase, (B) the *sigH* regulon, (C) cysteine metabolism, (D) PTS transport and (E) other metabolic pathways. Asterisks indicate statistical significance determined with a Kruskal-Wallis test followed by an uncorrected Dunn's test or a two way ANOVA followed by a

Fisher's least significant difference test (\*\*  $p \leq 0.001$  \*\*\*  $p \leq 0.001$ , \*\*\*\*  $p \leq 0.0001$  vs  $630\Delta erm$ ). Data shown indicate biological replicates from experiment performed on different days, the bars represent the mean and the error bars represent the SEM.

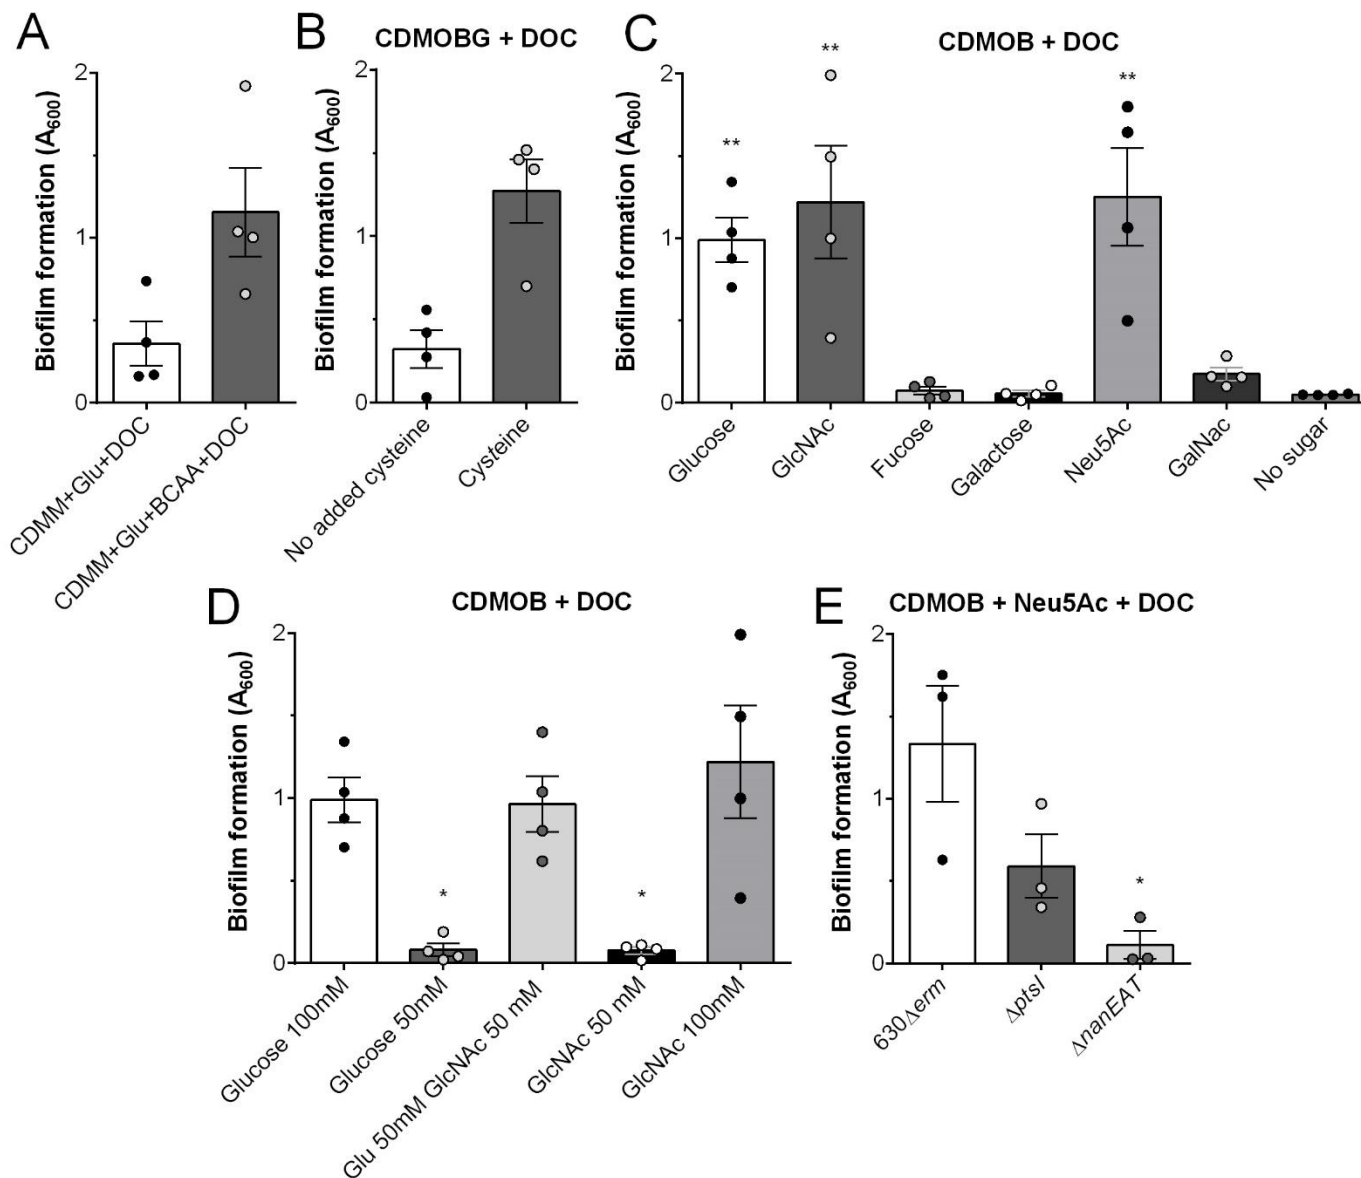



**Figure 4: Combination of branched chain amino acid, cysteine and mucus derived sugars induce biofilm formation in CDMOB supplemented with 240  $\mu$ M DOC.** Biofilm formation was assessed 48 h after incubation when medium was supplemented with 1% (w/v) BCAA supplementation (A), without cysteine supplementation (B), 100 mM mucus derived sugars (C) or glucose (Glu) and N-acetyl-glucosamine (GluNAc; D). Neu5Ac: N-acetylneuraminic acid; GalNAc; N-acetylgalactosamine. Experiments presented in panel B and C were performed at the same time. Biofilm formation by  $\Delta ptsI$  and  $\Delta nanEAT$  in medium supplemented with 100 mM Neu5Ac (E). Asterisks indicate statistical significance determined with a Kruskal-Wallis test followed by an uncorrected Dunn's test (\*  $p \leq 0.05$ , \*\*  $p \leq 0.001$  vs no sugars, 100 mM glucose or 630  $\Delta erm$ ). Data shown indicate biological replicates from experiment performed on different days, the bars represent the mean and the error bars represent the SEM.

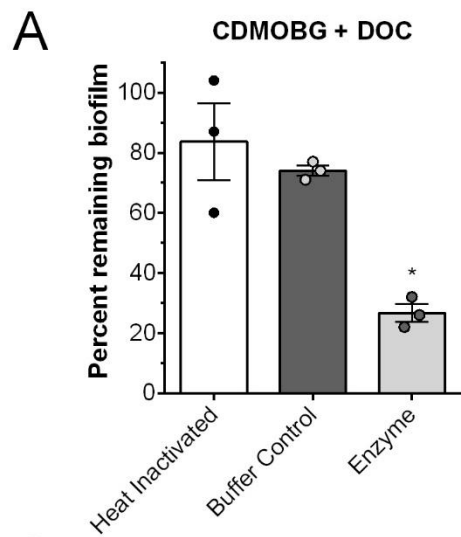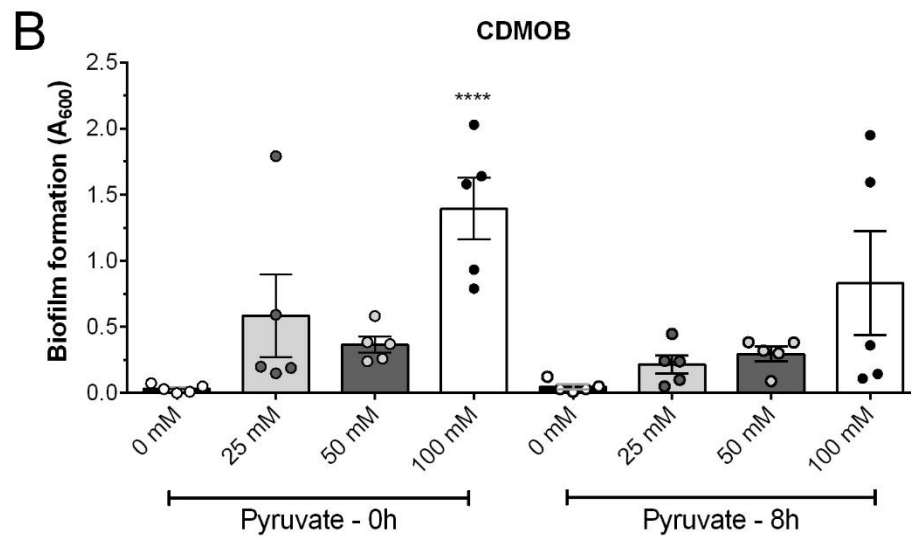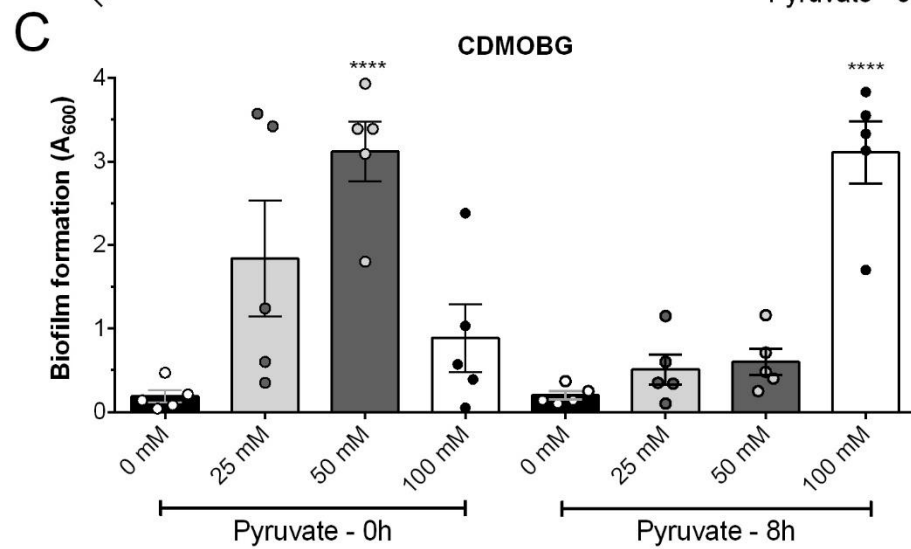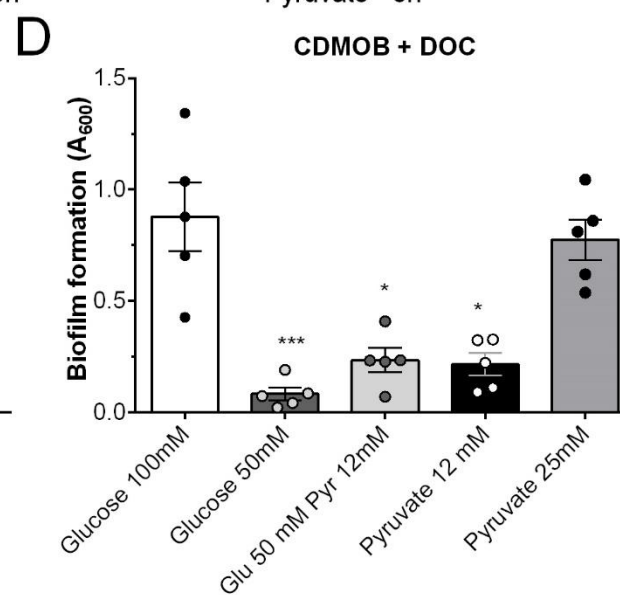

**Figure 5: Presence of extracellular pyruvate induces biofilm formation.** (A) Effect of enzymatic depletion of extracellular pyruvate on 48 h biofilm formation in *C. difficile*. Pyruvate dehydrogenase was added to *C. difficile* grown in CDMOBG after 24 h of growth. Control culture were treated with heat inactivated enzyme or buffer are shown. Effect of pyruvate on 48 h biofilm formation in the absence of DOC by *C. difficile* grown in CDMOB (B) or CDMOBG (C). Where indicated, pyruvate was added at inoculation (0 h) or after 8 hours of growth (8 h). (D) Biofilm formation for *C. difficile* 630 $\Delta$ *erm* in CDMOB in the presence of 240  $\mu$ M DOC and glucose (glu) and/or pyruvate (pyr). For A, and D, asterisks indicate statistical significance determined with a Kruskal-Wallis test followed by an uncorrected Dunn's test (\*  $p \leq 0.05$ , vs heat inactivated enzyme; \*  $p \leq 0.05$ , \*\*\*  $p \leq 0.001$  vs 100 mM glucose). For B, and C, asterisks indicate statistical significance determined with a two-way ANOVA followed by Fisher's least significant difference test (\*\*\*\*  $p \leq 0.001$  vs 0 mM pyruvate). Data shown indicate biological replicates from experiment performed on different days, the bars indicate the mean and the error bars represent the SEM.

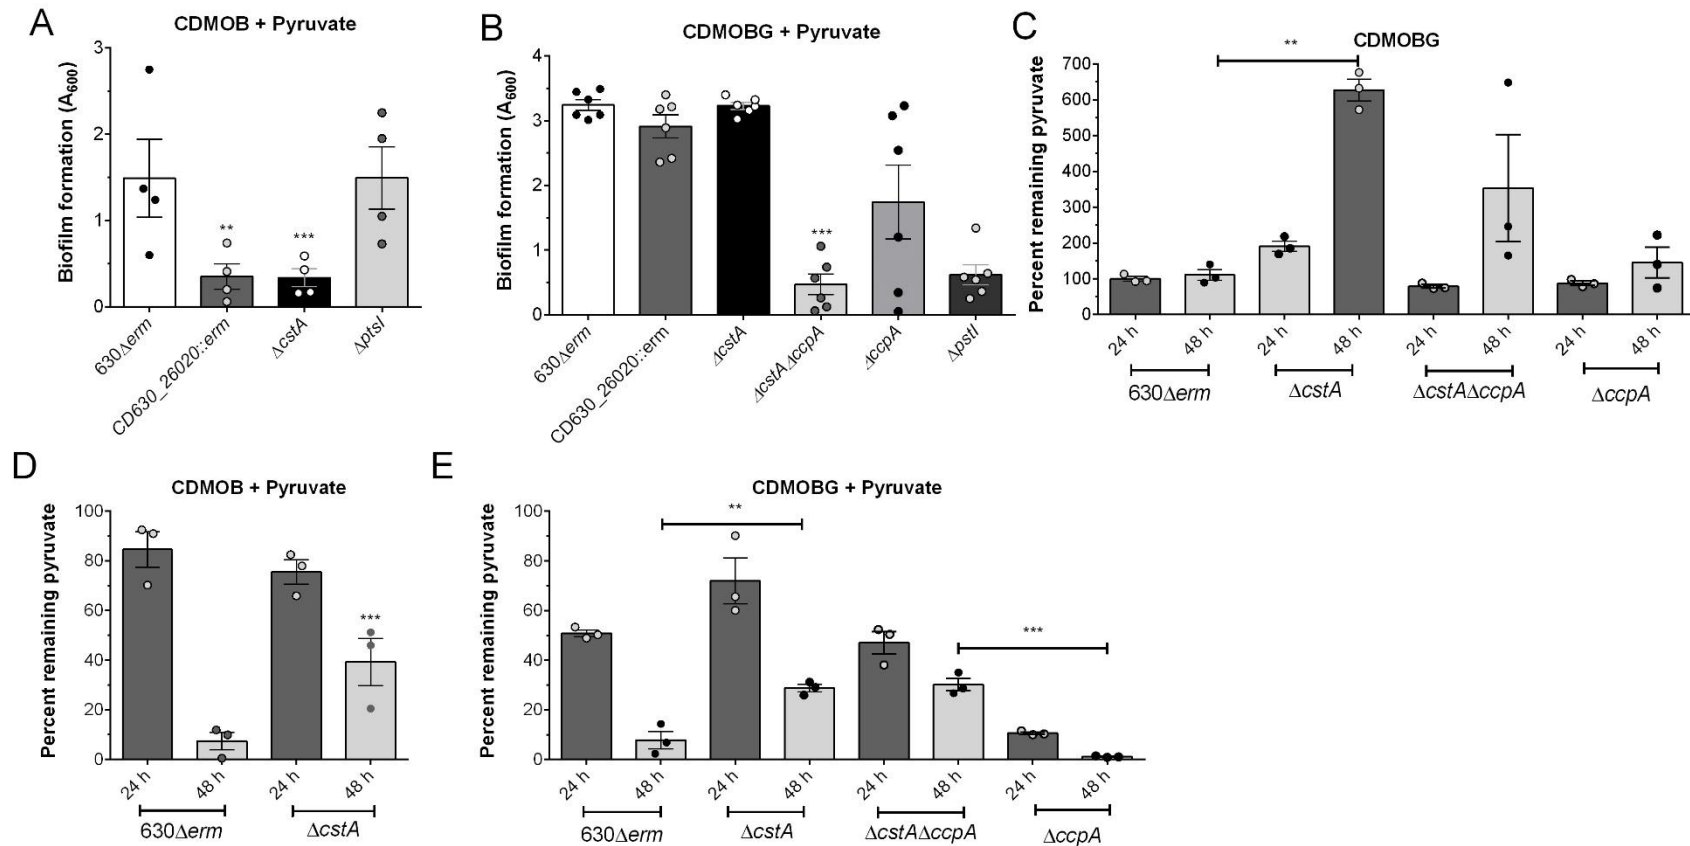

**Figure 6: Biofilm formation in the presence of pyruvate is CtsA dependent.** Biofilm formation was assessed in strains lacking the CD630\_26020-CD630\_26010 TCS, *cstA*, *ptsI*, *ccpA* or *ccpA* and *cstA* in CDMOB with pyruvate (A) and CDMOBG with pyruvate (B). Pyruvate used during growth by the parental,  $\Delta$ *cstA*,  $\Delta$ *ccpA* or  $\Delta$ *cstA* $\Delta$ *ccpA* strains grown in CDMOBG (D), CDMOB with 100 mM pyruvate (D) or CDMOBG with 50 mM pyruvate (E) (% remaining = 100  $\times$  pyruvate in media after growth (24 h or 48 h)/ starting pyruvate concentration). For A, and B, asterisks indicate statistical significance determined with a Kruskal-

Wallis test followed by an uncorrected Dunn's test (\*\*  $p \leq 0.001$  \*\*\*  $p \leq 0.001$ , vs  $630\Delta erm$ ). For C, D and E, asterisks indicate statistical significance determined with a two-way ANOVA test followed by Fisher's least significant difference test (\*\*  $p \leq 0.001$ , \*\*\*  $p \leq 0.001$  vs  $630\Delta erm$ ). Data shown indicate biological replicates from experiment performed on different days, the bars represent the mean and the error bars represent the SEM.

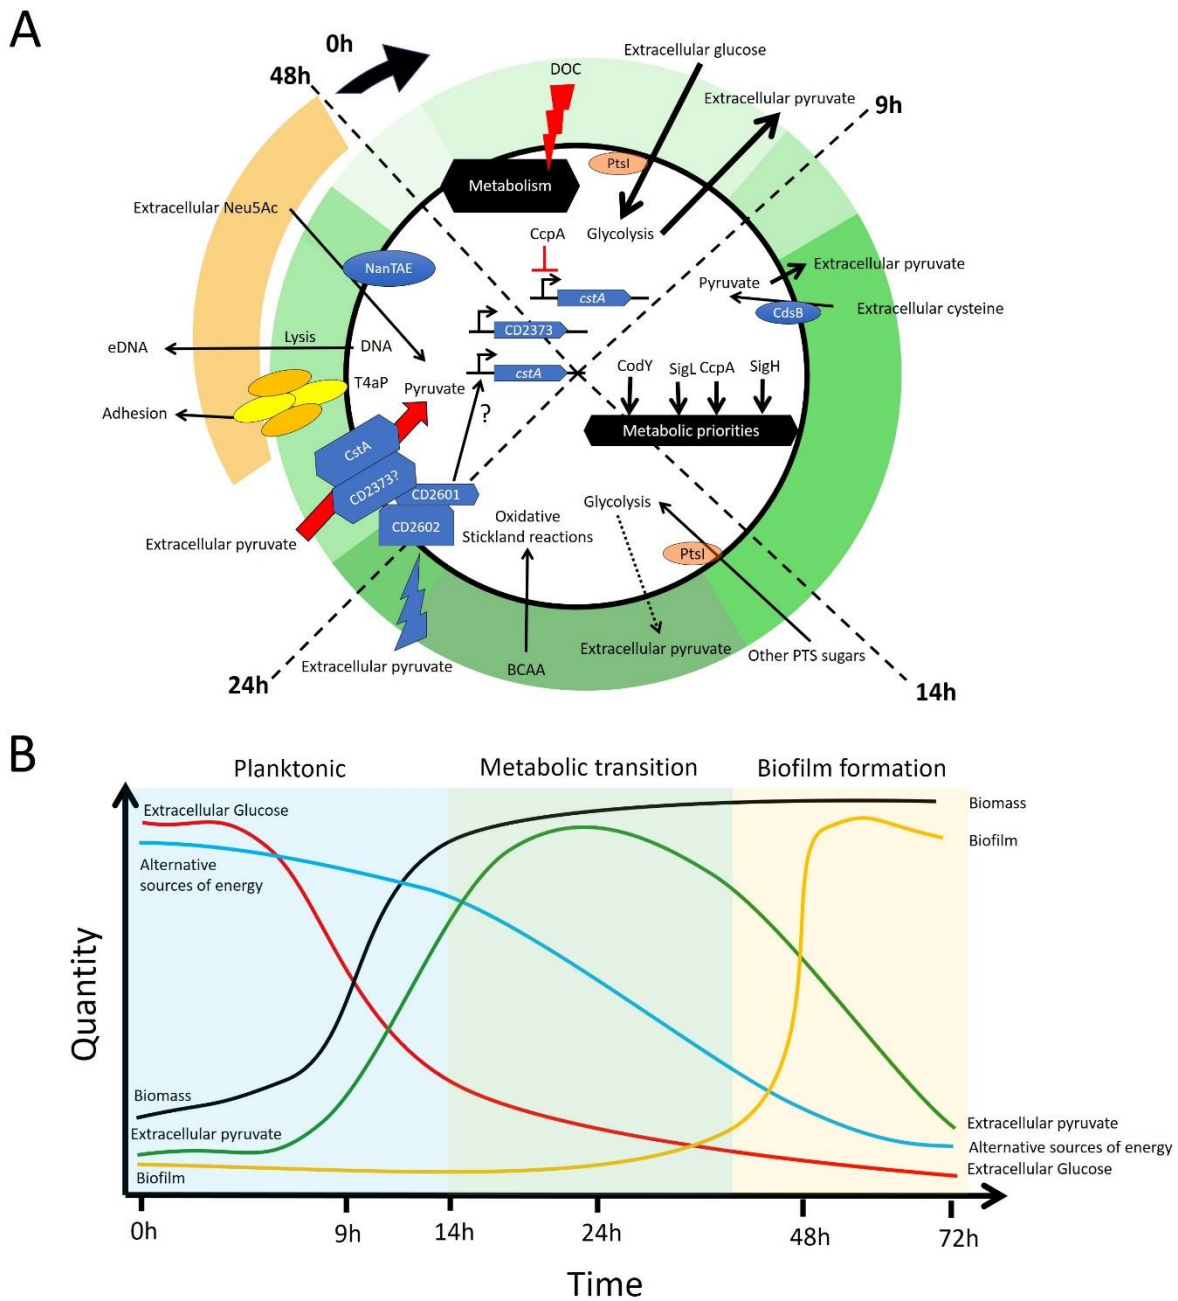

**Figure 7. Proposed model of cellular processes leading to DOC-induced biofilm formation.** (A) Important cellular processes that contribute to metabolic adaptation and biofilm formation are highlighted for each time interval. Green outer ring indicates the concentration of extracellular pyruvate; darker shades of green are indicative of increased

pyruvate concentrations (i.e. light green is the lowest concentration and dark green is the highest concentration). The straw-colored arc indicates when *C. difficile* forms a biofilm. Arrows indicate cellular processes that occur, and the thickness of the arrows indicates how essential they are for biofilm formation (i.e. dashed arrows: least essential, thick, full arrows: absolutely required). (B) Line graph showing hypothetical model of the changes in the quantity of extracellular nutrients, biomass, and biofilm over time. Briefly, during exponential phase (light blue shading), the PTS will import glucose leading to excretion of pyruvate. Glucose is preferentially used until the bacteria enter stationary phase (light green shading) after approximately 14 h of growth. After entry into stationary phase, there is a metabolic shift driven by CcpA, SigH, SigL and CodY, and cells start using alternative sources of energy. As *C. difficile* progresses through stationary phase, it will sense extracellular pyruvate via CD630\_26010-26020 TCS and will start actively importing extracellular pyruvate via CstA and other importers such as CD630\_23730. The use of extracellular pyruvate maintains *C. difficile* viability during the stationary phase and the type IVa pili (T4aP) machinery will start assembly pili to enhance adherence. A sub-population of the cells will undergo lysis contributing eDNA for the biofilm matrix and, as time passes, the biofilm biomass will increase reaching its peak at approximately 48 h (biofilm phase indicated in yellow).

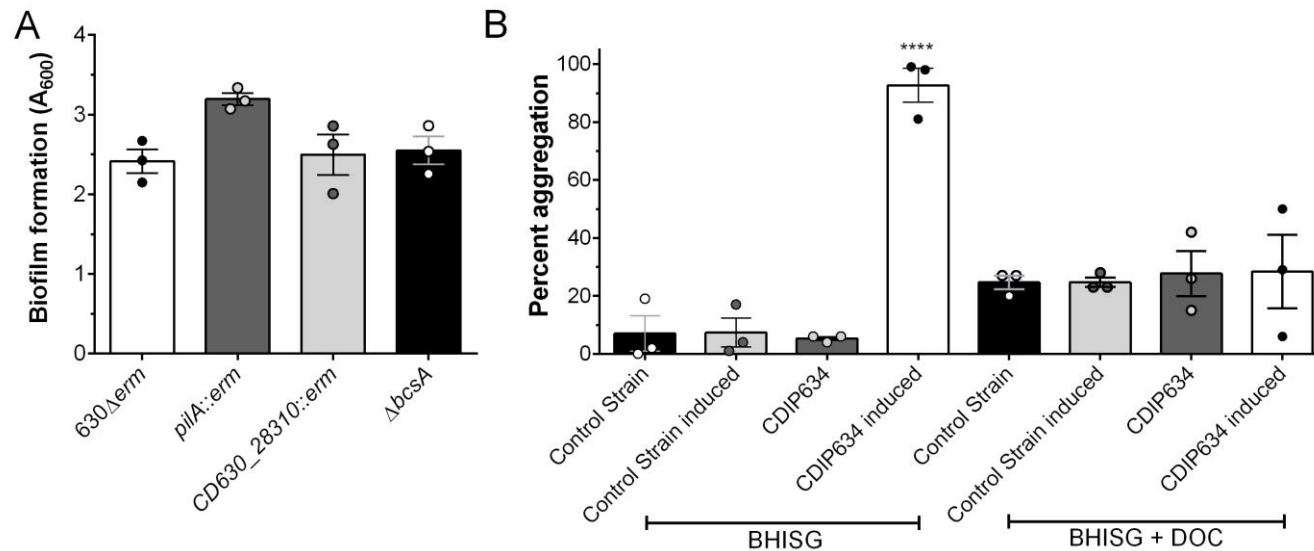

**Figure S1: Biofilm formation or aggregation in BHISG supplemented with 240  $\mu$ M DOC does not require *PilA1*, *CD630\_28310*, *BscA* or overproduction of c-di-GMP.** (A) Biofilm formation by the *pilA1::erm* and the *CD630\_630\_28310::erm* strains in BHISG with 240  $\mu$ M DOC. (B) A strain overexpressing *CD630\_1420* (c-di-GMP overproduction) and a control strain were grown in BHISG or BHISG supplemented with 240  $\mu$ M DOC in the presence or absence of an inducer in a test tube. Aggregation was assessed after 9h (BHISG) or 24h (BHISG with 240  $\mu$ M DOC). Percent aggregation =  $100 - [100 \times (\text{OD}_{600} \text{ top 1 cm of undisturbed culture} / \text{OD}_{600} \text{ culture after vortexing})]$ . (C) Biofilm formation by the  $\Delta*bscA*$  strain in BHISG with 240  $\mu$ M DOC. Asterisks indicate statistical significance determined with a Kruskal-Wallis test followed by an uncorrected Dunn's test (\*\*\*\*  $p \leq 0.001$  vs *CDIP634*). Data shown indicate biological replicates performed on different days, the bars represent the mean and the error bars represent the SEM.



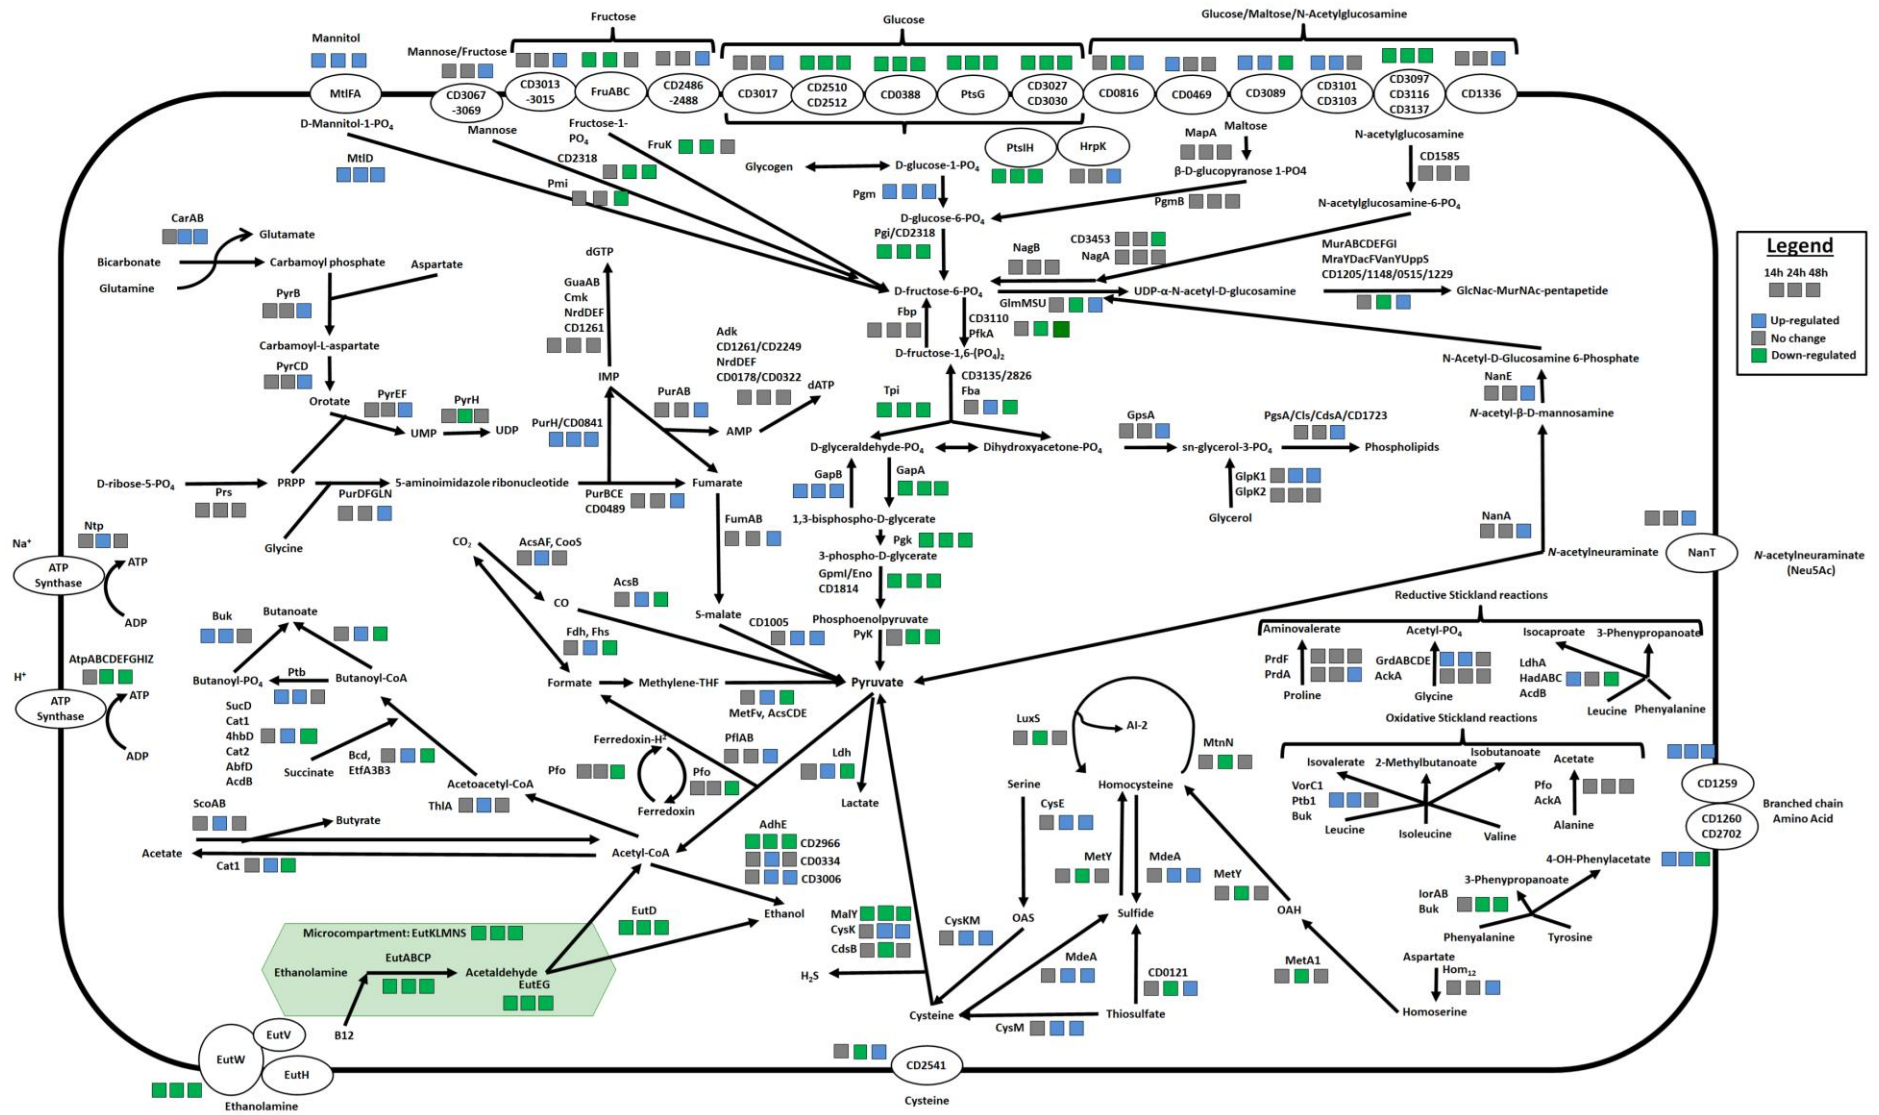

**Figure S2: Overview of transcriptomic changes over time in *C. difficile* metabolic pathways during grown in BHISG**

**supplemented with 240  $\mu$ M of DOC.** Cartoon of a bacterial cells with the outside line representing the cell envelope. Cellular processes are place in their predicted cellular location. For example, membrane proteins and transporter are placed on the outside line. Each group of three squares indicate a specific time point (left to right: 14 h, 24 h and 48 h, respectively) and the changes in expression are colour coded (in grey, no changes; blue, up-regulated; or green, down-regulated). The 9 h time point was used as the reference point. Gene ID are used instead of the locus tag to prevent clutter, please see Supplementary data for equivalencies.

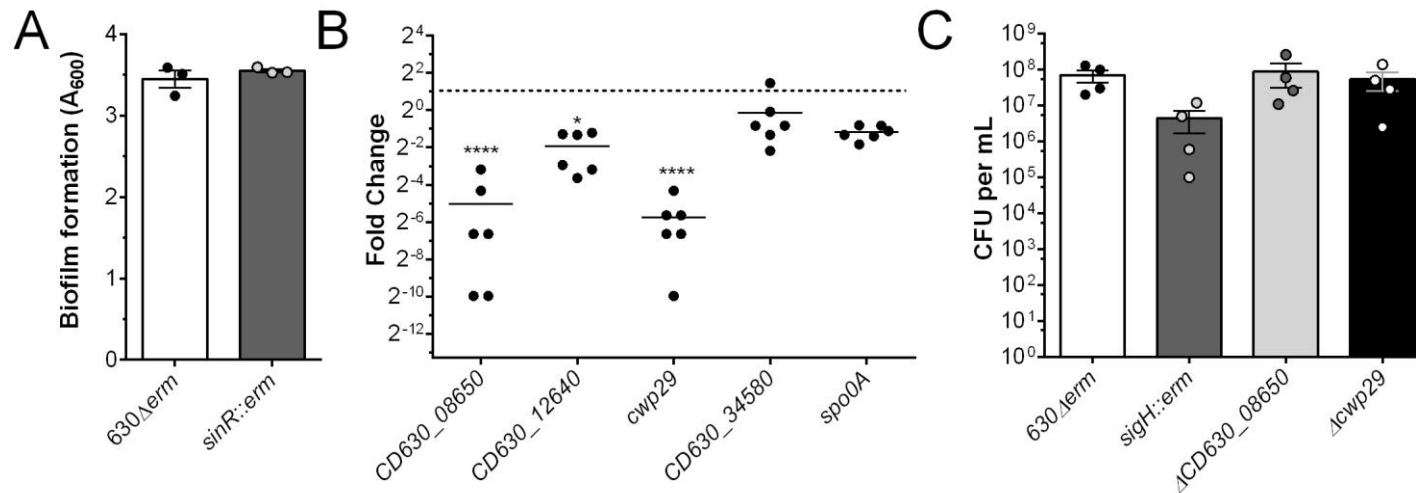

**Figure S3: SinR is not required for biofilm formation and CD630\_08650 and *cwp29* expression is induced by SigH.** (A) Biofilm formation by the *sinR::erm* strain in BHISG supplemented with 240 μM DOC. (B) Change in expression of *CD630\_08650*, *CD630\_12640*, *cwp29* and *CD630\_34580* in the *sigH::erm* strain compared to the parental strain after 24 h growth in BHISG supplemented with 240 μM DOC. Expression was normalized to *codY* and *rex*; *spo0A* expression is used as a positive control. The dotted line represents the no changes in expression threshold. (C) Number of viable vegetative cells recovered for the parental, *sigH::erm*,  $\Delta$ *CD630\_08650* and  $\Delta$ *cwp29* strains after 24 h of growth in BHISG supplemented with 240 μM DOC. Asterisks indicate statistical significance determined with a Kruskal-Wallis test followed by an uncorrected Dunn's test (\*  $p \leq 0.05$ , \*\*\*\*  $p \leq 0.0001$  vs 630Δ*erm*). Data shown indicate biological replicates performed on different days, the bars represent the mean and the error bars represent the SEM.

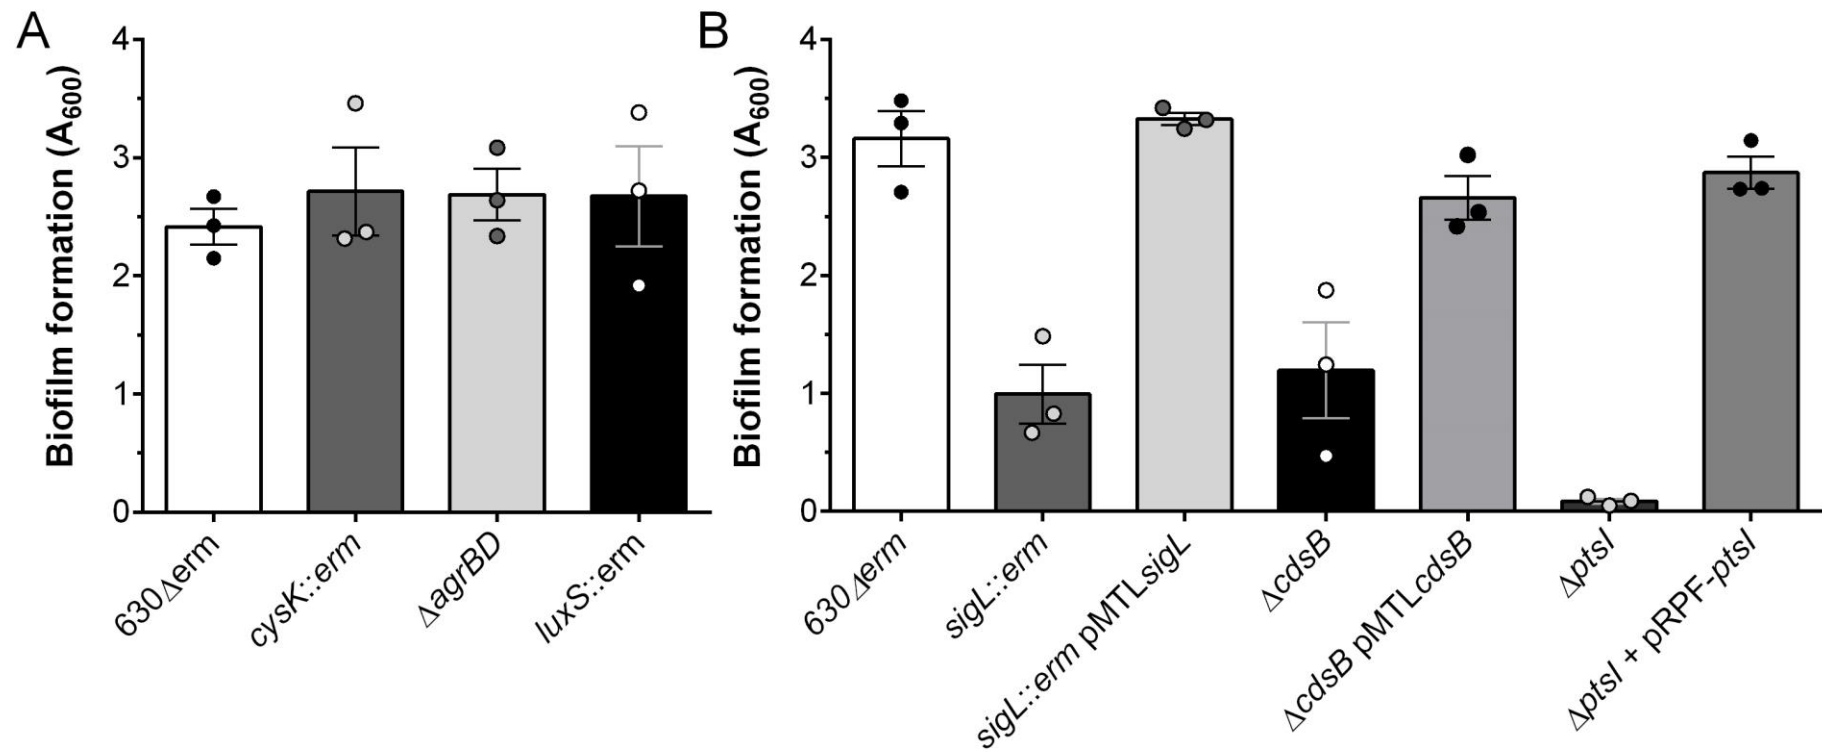

**Figure S4 Absence of *cysK*, *luxS* or *agrBD* does not affect biofilm formation and complementation of the *ptsI* or *cdsB* strains restore biofilm formation in BHISG supplemented with 240  $\mu$ M DOC.** Data shown indicate biological replicates performed on different days, the bars represent the mean and the error bars represent the SEM.

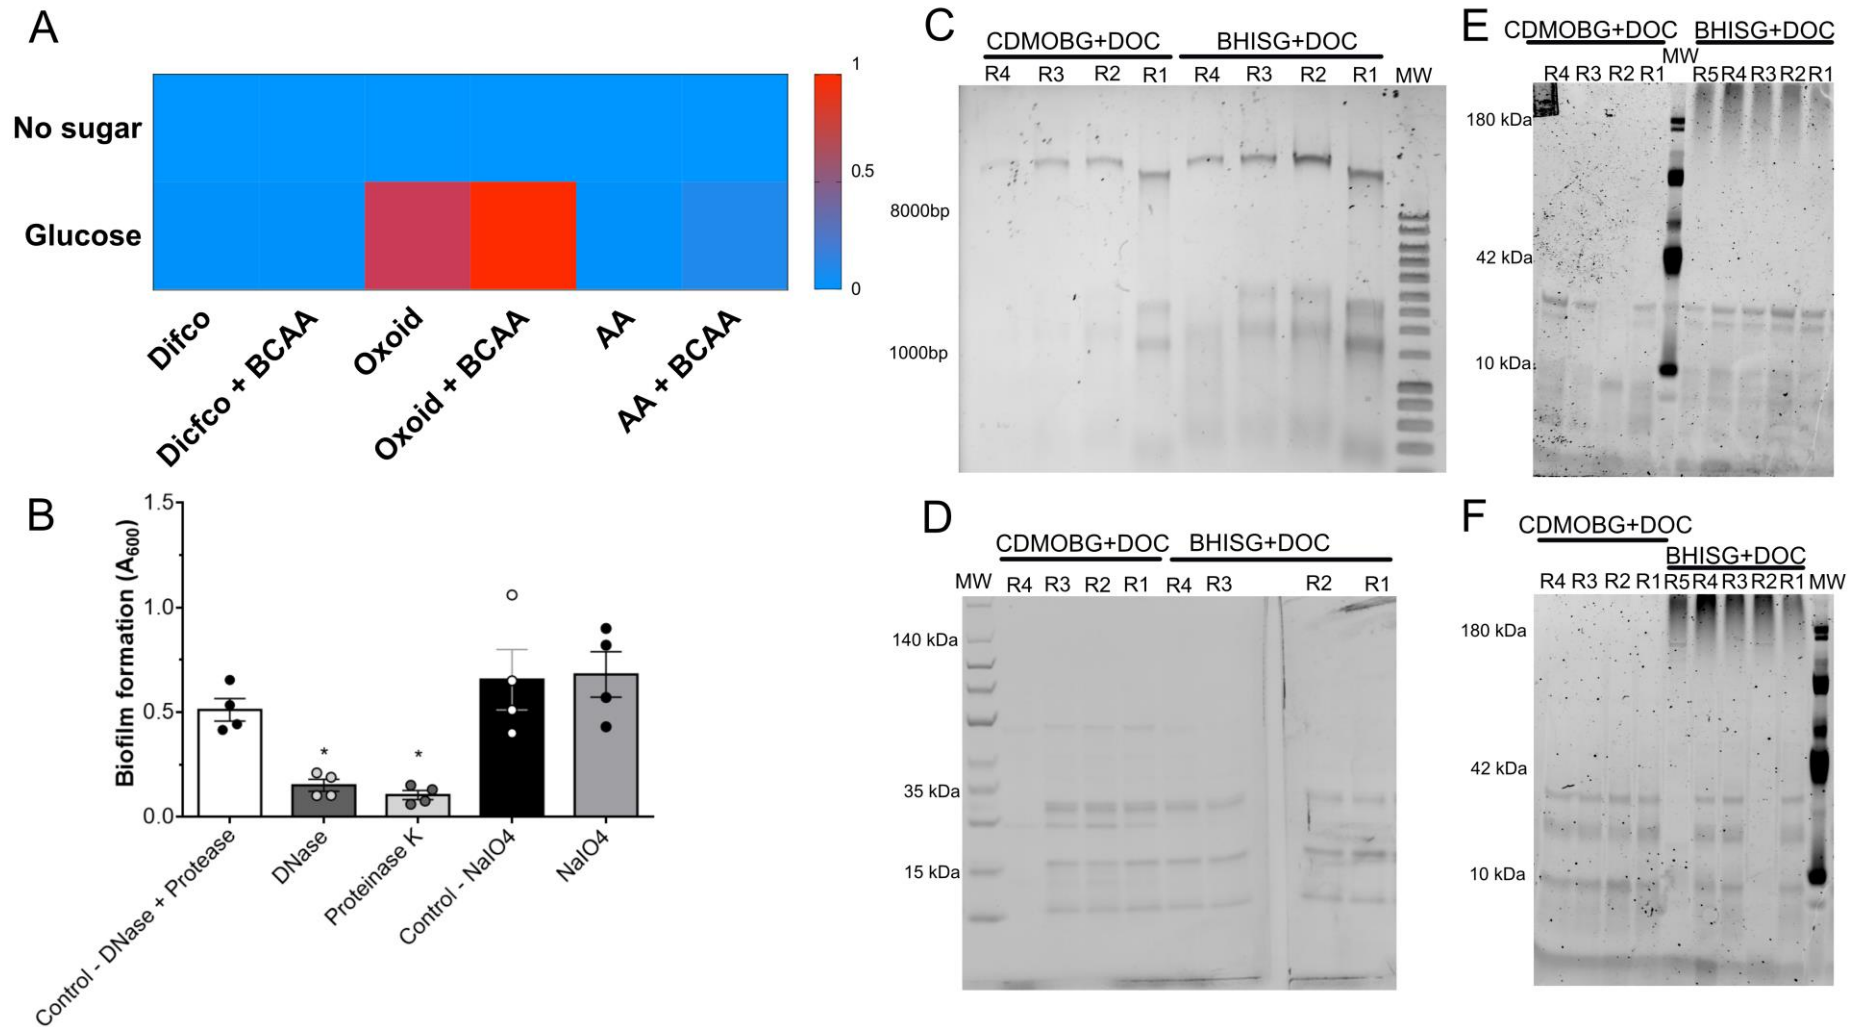

**Figure S5: Analysis and optimization of biofilm formation in a semi-defined medium.** Heat map for the CDMM optimization with different amino acid sources (A). Enzymatic and chemical dispersion of the preformed biofilm in CDMOBG supplemented with 240  $\mu$ M

DOC (B). Asterisks indicate statistical significance determined with a Kruskal-Wallis test followed by an uncorrected Dunn's test ( $p \leq 0.05$  vs WT). Data shown indicate biological replicates performed on different days and the bar represent the mean. Agarose gel electrophoresis confirming the presence of eDNA in the biofilm matrix (C). SDS-PAGE analysis of the biofilm matrix for the presence of proteins (D), glycoproteins (E) and DNase/protease-resistant material (F). DNA was stained with ethidium bromide, proteins with Coomassie blue, and glycol-proteins and DNase/Proteinase K resistant material with the Pro-Q Emerald 300 glycoprotein stain. R1, R2, R3, R4 and R5 indicate the replicate number.

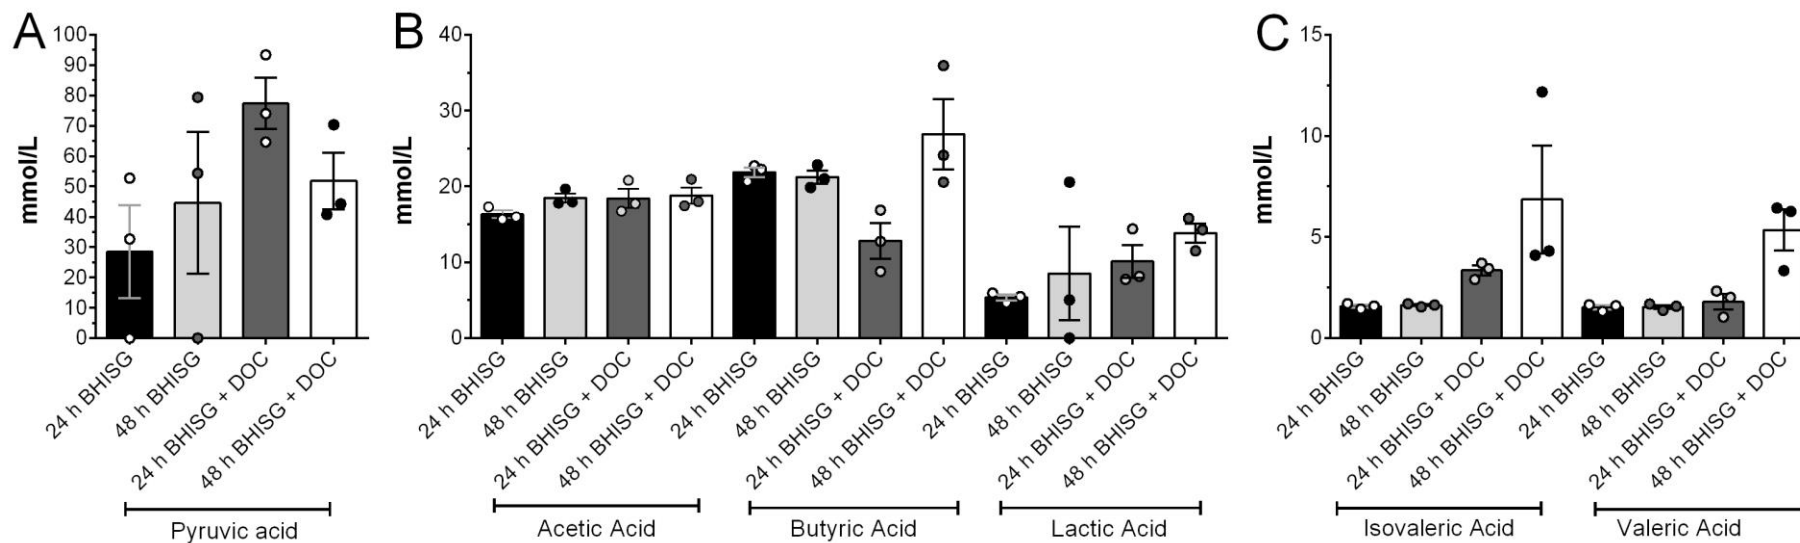

**Figure S6. Gas chromatate of culture supernatant of *C. difficile* grown in BHISG and BHISG with 240  $\mu$ M DOC for 24 h or 48 h. To improve visualisation, data was split in based on the amount of each fatty acid detected. (A) pyruvic acid, (B) Acetic, butyric and lactic acid, (C) isovaleric and valeric acid. Data shown indicate biological replicates from supernatant collected on different days, the bar represent the mean and the error bar represent the SEM.**

**Table S1: Differential expression of genes associated with c-di-GMP signalling**

| Locus Tag   | Description                                        | 14H  | 24H  | 48H  |
|-------------|----------------------------------------------------|------|------|------|
| CD630_02040 | Putative signaling protein                         | 1    | 1    | 1    |
| CD630_05220 | Putative c-di-GMP regulatory protein               | 1    | 1    | 1    |
| CD630_05370 | Putative CheY-like chemosensory protein            | 1    | 1    | 1    |
| CD630_05830 | Putative diguanylate kinase signaling protein      | 1    | 1    | 1    |
| CD630_05840 | Putative diguanylate kinase signaling protein      | 1    | 1    | 1    |
| CD630_07070 | Putative diguanylate kinase signaling protein      | 1    | 2.39 | 2.45 |
| CD630_07570 | Phosphodiesterases protein                         | 1    | 2.32 | 1    |
| CD630_08110 | Putative cyclic di-GMP regulatory protein          | 2.22 | 2.05 | 1    |
| CD630_09970 | Two-component sensor histidine kinase              | 1    | 1    | 1.97 |
| CD630_10150 | Two-component sensor histidine kinase              | 1    | 1    | 1    |
| CD630_10280 | Putative signaling protein                         | 1    | 1    | 1    |
| CD630_11850 | Putative diguanylate kinase signaling protein      | 1    | 1.92 | 1    |
| CD630_14190 | Putative diguanylate kinase signaling protein      | 1    | 3.14 | 2.66 |
| <i>dccA</i> | Diguanylate cyclase protein                        | 1    | 1    | 2.84 |
| CD630_14210 | Putative diguanylate kinase signaling protein      | 1    | 1    | 3.69 |
| CD630_14760 | Putative signaling protein                         | 1    | 5.43 | 2.55 |
| CD630_15150 | Putative diguanylate kinase signaling protein      | 1    | 3.33 | 2.13 |
| CD630_15380 | Putative signaling protein                         | 1    | 1    | 1    |
| CD630_16160 | Putative diguanylate kinase signaling protein      | 1    | 1    | 1    |
| CD630_16510 | Putative signaling protein                         | 1    | 2.08 | 2.08 |
| CD630_18400 | Putative diguanylate kinase signaling protein      | 1    | 1    | 1    |
| CD630_18410 | Two-component sensor histidine kinase              | 1    | 1    | 1    |
| CD630_21340 | Putative signaling protein                         | 1    | 4.1  | 6.51 |
| CD630_22440 | Putative diguanylate kinase signaling protein      | 1    | 0.46 | 3.69 |
| CD630_23840 | Putative diguanylate cyclase signaling protein     | 1    | 1    | 1    |
| CD630_23850 | Putative diguanylate cyclase signaling protein     | 1    | 0.33 | 1    |
| <i>bcsA</i> | Cellulose synthase catalytic subunit (UDP-forming) | 1    | 1    | 7.48 |
| CD630_26630 | Putative signaling protein                         | 1    | 1    | 2.39 |
| CD630_27530 | Putative signaling protein                         | 1    | 0.51 | 1    |
| CD630_27540 | Putative diguanylate kinase signaling protein      | 1    | 0.35 | 1    |



|               |                                                     |   |       |       |
|---------------|-----------------------------------------------------|---|-------|-------|
| CD630_27600   | Putative signaling protein                          | 1 | 1     | 1     |
| CD630_28730   | Putative signaling protein                          | 1 | 1     | 1     |
| CD630_28870   | Putative diguanylate kinase signaling protein       | 1 | 1     | 1     |
| CD630_29650   | Putative signaling protein                          | 1 | 4.64  | 1     |
| CD630_33650   | Putative diguanylate kinase signaling protein       | 1 | 2.3   | 1     |
| CD630_36250   | Putative signaling protein                          | 1 | 1     | 0.5   |
| CD630_36500   | PTS system, lactose/cellobiose-family IIC component | 1 | 1     | 1     |
| CD630_Cdi1_01 | GEMM RNA motif                                      | 1 | 1     | 1     |
| CD630_Cdi1_02 | GEMM RNA motif                                      | 1 | 0.31  | 8.4   |
| CD630_Cdi1_03 | GEMM RNA motif                                      | 1 | 1     | 1     |
| CD630_Cdi1_04 | GEMM RNA motif                                      | 1 | 20.37 | 11.17 |
| CD630_Cdi1_05 | GEMM RNA motif                                      | 1 | 12.95 | 7.17  |
| CD630_Cdi1_06 | GEMM RNA motif                                      | 1 | 1     | 1     |
| CD630_Cdi1_07 | GEMM RNA motif                                      | 1 | 1     | 1     |
| CD630_Cdi1_08 | GEMM RNA motif                                      | 1 | 1     | 0.08  |
| CD630_Cdi1_09 | GEMM RNA motif                                      | 1 | 1     | 0.33  |
| CD630_Cdi1_10 | GEMM RNA motif                                      | 1 | 4.67  | 1     |
| CD630_Cdi1_11 | GEMM RNA motif                                      | 1 | 1     | 0.09  |
| CD630_Cdi1_12 | GEMM RNA motif                                      | 1 | 3.98  | 1     |
| CD630_Cdi2_1  | c-di-GMP-II                                         | 1 | 1     | 1     |
| CD630_Cdi2_2  | c-di-GMP-II                                         | 1 | 1     | 1     |
| CD630_Cdi2_3  | c-di-GMP-II                                         | 1 | 1     | 0.25  |
| CD630_Cdi2_4  | c-di-GMP-II                                         | 1 | 1     | 1     |

**Table S2: Differential expression of genes with SigH binding box in their promoter**

| Gene name          | Description                                           | BHISG + 240 $\mu$ M |       |      |
|--------------------|-------------------------------------------------------|---------------------|-------|------|
|                    |                                                       | 14h                 | 24h   | 48h  |
| <i>spo0A</i>       | Stage 0 sporulation protein A                         | 1                   | 1     | 1    |
| <i>CD630_24920</i> | Histidine kinase associated to Spo0A                  | 1                   | 1     | 1    |
| <i>Soj</i>         | Sporulation initiation inhibitor                      | 1                   | 1     | 1    |
| <i>spoIIAA</i>     | Anti-sigma F factor antagonist                        | 1                   | 1     | 0.48 |
| <i>spoVS</i>       | Stage V sporulation protein S                         | 1                   | 1     | 1    |
| <i>spoVG</i>       | Regulator required for spore cortex synthesis         | 1                   | 7.03  | 1    |
| <i>CD630_36730</i> | Putative stage 0 sporulation protein, Spo0J-like      | 1                   | 1     | 1    |
| <i>CD630_35690</i> | Sporulation-specific protease                         | 1                   | 1     | 1    |
| <i>ftsZ</i>        | Cell division protein FtsZ                            | 1                   | 1     | 1    |
| <i>minC</i>        | Cell division regulator                               | 1                   | 1     | 1.92 |
| <i>CD630_26240</i> | Conserved hypothetical protein                        | 1                   | 1     | 1    |
| <i>sigA2</i>       | Transcription                                         | 1                   | 7.24  | 1    |
| <i>CD630_01420</i> | Putative RNA-binding protein                          | 1                   | 1     | 1    |
| <i>CD630_08380</i> | DNA-binding protein                                   | 2.03                | 1.95  | 1    |
| <i>gapN</i>        | Glyceraldehyde-3-P dehydrogenase                      | 1                   | 0.41  | 4.79 |
| <i>glgC</i>        | Glucose-1-P adenylyltransferase                       | 1                   | 11.03 | 3    |
| <i>fdhF</i>        | Formate dehydrogenase                                 | 3.38                | 4.16  | 0.41 |
| <i>cobT</i>        | Nicotinate-nucleotide-dimethylbenzimidazole           | 2.65                | 1     | 0.21 |
| <i>CD630_34560</i> | 5-Formyltetrahydrofolate cycloligase                  | 1                   | 3.2   | 1    |
| <i>CD630_27380</i> | Putative cytosine permease                            | 1                   | 1     | 5.45 |
| <i>CD630_07600</i> | Putative Ca <sup>2+</sup> /Na <sup>+</sup> antiporter | 1                   | 1     | 1    |
| <i>CD630_27890</i> | Putative adhesin Cwp66                                | 1                   | 1     | 1    |
| <i>CD630_04400</i> | Putative cell wall-binding protein                    | 1                   | 1     | 1    |
| <i>cwp29</i>       | Cell surface protein                                  | 1                   | 8.3   | 1    |
| <i>lplA</i>        | Lipoate protein-ligase                                | 1                   | 1     | 1    |
| <i>CD630_34580</i> | Membrane protein                                      | 1                   | 13.84 | 1    |
| <i>CD630_28000</i> | Membrane protein                                      | 1                   | 1     | 1    |
| <i>CD630_22950</i> | Membrane protein                                      | 1                   | 1     | 1    |
| <i>CD630_15900</i> | Membrane protein                                      | 1                   | 1     | 1    |
| <i>CD630_08650</i> | Putative ADP-ribose binding protein                   | 4.58                | 6.35  | 1    |
| <i>CD630_24470</i> | Putative histidine triad (HIT) protein                | 1                   | 2.36  | 0.49 |
| <i>CD630_36540</i> | Putative DNA replication protein                      | 1                   | 1     | 1    |
| <i>CD630_00220</i> | Elongation factor G (EF-G)                            | 6.65                | 82.16 | 1    |
| <i>CD630_21370</i> | Ribosome-recycling factor                             | 1                   | 1     | 1    |
| <i>CD630_19410</i> | Unknown function                                      | 1                   | 1     | 1    |
| <i>CD630_15431</i> | Unknown function                                      | 1                   | 11.51 | 1    |
| <i>CD630_12640</i> | Unknown function                                      | 1                   | 9.18  | 1    |
| <i>CD630_10610</i> | Unknown function                                      | 1                   | 2.29  | 1    |
| <i>CD630_13170</i> | Unknown function                                      | 1                   | 1     | 3.57 |

|                    |                  |      |      |   |
|--------------------|------------------|------|------|---|
| <i>CD630_16220</i> | Unknown function | 2.77 | 3.53 | 1 |
|--------------------|------------------|------|------|---|

**Table S3: List of strains and plasmids used for qPCR and gene construct**

| Strains and plasmids     | PCR-ribotype/Genotype                                  | Resistance <sup>1</sup> | Reference               |
|--------------------------|--------------------------------------------------------|-------------------------|-------------------------|
| 630Δerm                  | 012                                                    |                         | Hussain et al 2005      |
| CDIP1168                 | 630Δerm <i>sigH::erm</i>                               | Erm                     | Saujet et al. 2011      |
| CDIP3                    | 630 Δerm <i>spo0A::erm</i>                             | Erm                     | Pereira et al. 2013     |
| CDIP1496                 | 630Δerm ΔCD630_08650                                   |                         | This study              |
| CDIP1497                 | 630Δerm Δ <i>cwp29</i> (CD630_23050)                   |                         | This study              |
| CDIP9                    | 630Δerm <i>sinR::erm</i> (CD630_22140-22150)           | Erm                     | Poquet et al, 2018      |
| <i>pilA</i> <sub>1</sub> | 630Δerm <i>pilA1::erm</i> (CD630_35130)                | Erm                     | Poquet et al, 2018      |
| CD2831                   | 630Δerm <i>CD630_28310::erm</i>                        | Erm                     | Poquet et al, 2018      |
| CDIP1382                 | 630Δerm Δ <i>pilW</i> (CD630_23050)                    |                         | This study              |
| CDIP1443                 | 630Δerm ΔT4aP Cluster 1                                |                         | This study              |
| CDIP1444                 | 630Δerm ΔT4aP Cluster 2                                |                         | This study              |
| CDIP1463                 | 630Δerm Δ <i>bcsA</i>                                  |                         | This study              |
| CDIP1383                 | 630Δerm Δ <i>agrDB</i> (CD630_27491-27500)             |                         | This study              |
| CDIP1160                 | 630Δerm <i>fliC::erm</i> (CD630_02390)                 | Erm                     | Iman El Meouche         |
| CDIP550                  | 630Δerm <i>sigD::erm</i> (CD630_02660)                 | Erm                     | El Meouche, et al. 2013 |
| CDIP634                  | 630Δerm with chromosomal P <sub>tet</sub> -CD630_14200 |                         | Johann Peltier          |
| CDIP1384                 | 630Δerm Δ <i>ptsI</i> (CD630_27550)                    |                         | This study              |
| CDIP1697                 | CDIP1384 with pDIA6996                                 | Tm                      | This study              |
| CDIP1385                 | 630Δerm Δ <i>hprK</i> (CD630_34090)                    |                         | This study              |
| CDIP217                  | 630Δerm <i>sigL::erm</i> (CD630_31760)                 | Erm                     | Dubois et al. 2016      |
| CDIP342                  | CDIP217 with pDIA6309                                  | Erm, Tm                 | Dubois et al. 2016      |
| CDIP1318                 | 630Δerm Δ <i>cdsB</i> (CD630_332320)                   |                         | This study              |
| CDIP1698                 | CDIP1318 with pDIA6997                                 | Tm                      | This study              |
| CDIP540                  | 630Δerm <i>cysK::erm</i> (CD630_15970)                 | Erm                     | Dubois et al. 2016      |
| CDIP1725                 | 630Δerm <i>luxS::erm</i> (CD630_35980)                 | Erm                     | Thomas Dubois           |
| CDIP001                  | 630Δerm <i>fur::erm</i> (CD630_12870)                  | Erm                     | Dubois et al. 2016      |
| CDIP1445                 | 630Δerm Δ <i>fumAB-CD630_10050</i>                     |                         | This study              |
| CDIP1447                 | 630Δerm Δ <i>nanAE-CD630_22390</i>                     |                         | This study              |
| CDIP537                  | 630Δerm <i>rex::erm</i>                                | Erm                     | Laurent Bouillaut       |
| CDIP535                  | 630Δerm <i>prdB::erm</i>                               | Erm                     | Laurent Bouillaut       |
| CDIP657                  | 630Δerm <i>CD630_26020::erm</i>                        | Erm                     | Dubois et al. 2016      |
| CDIP1616                 | 630Δerm Δ <i>cstA</i> (CD630_26000)                    |                         | This study              |
| CDIP1335                 | 630Δerm Δ <i>ccpA</i>                                  |                         | This study              |
| CDIP1629                 | 630Δerm Δ <i>ccpA ΔcstA</i>                            |                         | This study              |
|                          |                                                        |                         |                         |
| <b>Plasmids</b>          |                                                        |                         |                         |
| pDIA6103                 | pRPF185Δ <i>gusA</i>                                   | Cm/Tm                   | Soutourina et al, 2013  |
| pDIA5929                 | pMTL84121                                              | Cm/Tm                   | Heap et al., 2009       |
| pDIA6753                 | pMSR                                                   | Cm/Tm                   | Peltier et al. 2020     |

|          |                                    |       |            |
|----------|------------------------------------|-------|------------|
| pDIA6794 | pMSR- $\Delta$ <i>agrBD</i>        | Cm/Tm | This study |
| pDIA6795 | pMSR- $\Delta$ <i>pilW</i>         | Cm/Tm | This study |
| pDIA6796 | pMSR- $\Delta$ <i>cdsB</i>         | Cm/Tm | This study |
| pDIA6797 | pMSR- $\Delta$ <i>hprK</i>         | Cm/Tm | This study |
| pDIA6821 | pMSR- $\Delta$ <i>ptsI</i>         | Cm/Tm | This study |
| pDIA6939 | pMSR- $\Delta$ T4aP Cluster 1      | Cm/Tm | This study |
| pDIA6940 | pMSR- $\Delta$ T4aP Cluster 2      | Cm/Tm | This study |
| pDIA6941 | pMSR- $\Delta$ <i>fumAB-CD1005</i> | Cm/Tm | This study |
| pDIA6945 | pMSR- $\Delta$ <i>bcsA</i>         | Cm/Tm | This study |
| pDIA7043 | pMSR- $\Delta$ <i>cstA</i>         | Cm/Tm | This study |
| pDIA6820 | pMSR- $\Delta$ <i>ccpA</i>         | Cm/Tm | This study |
| pDIA6979 | pMSR- $\Delta$ <i>CD0865</i>       | Cm/Tm | This study |
| pDIA6980 | pMSR- $\Delta$ <i>cwp29</i>        | Cm/Tm | This study |
| pDIA6996 | pRPF185- <i>ptsI</i>               | Cm/Tm | This study |
| pDIA6997 | pMTL84121- <i>cdsB</i>             | Cm/Tm | This study |

*Cm* : chloramphenicol; *Tm* : Thiamphenicol; *Erm* : Erythromycin

**Table S4: List of primers used for gene deletion and complementation constructs**

| Primer Name | Sequence                                                | Primers Description                                |
|-------------|---------------------------------------------------------|----------------------------------------------------|
| YDNT1007    | GTGTTTTTTGTTACCCTAAGTTTCGATTTTTACTAT<br>ATCATTCTTTTAAG  | Forward, upstream, <i>pilW</i> deletion            |
| YDNT1008    | TTAAGTATTCCTTCATTTATTTCCCTCC                            | Reverse, upstream, <i>pilW</i> deletion            |
| YDNT1009    | AATAAATGAAAGAATACTTAAATACAATAAATTTT<br>ATTTAATAATTGC    | Forward, downstream, <i>pilW</i> deletion          |
| YDNT1010    | AGATTATCAAAAAGGAGTTTTTATCAAAAATTAG<br>AACTTAAATGC       | Reverse, downstream, <i>pilW</i> deletion          |
| YDNT1011    | GTAGCACAAAGCTATATAGGCTAATGC                             | Forward, verification <i>pilW</i> deletion         |
| YDNT1028    | GGGTAAATATATTAGGAGAGTGTGC                               | Reverse, verification <i>pilW</i> deletion         |
| YDNT1027    | GTGTTTTTTGTTACCCTAAGTTTCACCAAAATCAAA<br>CCCATATCCAACCAC | Forward, upstream, <i>cdsB</i> deletion            |
| YDNT1020    | AACCAGTAGCGAGTAAGTGACAAAGGTATG                          | Reverse, upstream, <i>cdsB</i> deletion            |
| YDNT1021    | TCACTTACTCGCTACTGGTTCAGTACAC                            | Forward, downstream, <i>cdsB</i> deletion          |
| YDNT1022    | AGATTATCAAAAAGGAGTTTACTTATAATCAAGCA<br>TATGGTTAAAG      | Reverse, downstream, <i>cdsB</i> deletion          |
| YDNT1061    | CTCATTTCCCATCAATTATTC                                   | Forward, verification <i>cdsB</i> deletion         |
| YDNT1062    | GGCCAGGGAATATAAGAGAGTTGC                                | Reverse, verification <i>cdsB 2</i> deletion       |
| YDNT1023    | GTGTTTTTTGTTACCCTAAGTTTCAATTGCTGCCTT<br>ACCAAC          | Forward, upstream, <i>agrBD</i> deletion           |
| YDNT1024    | ATGACATCTGAATCAGCAATCTAAAGAAGAC                         | Reverse, upstream, <i>agrBD</i> deletion           |
| YDNT1025    | ATTGCTGATTGAGATGTCATTTTTTCAGC                           | Forward, downstream, <i>agrBD</i><br>deletion      |
| YDNT1026    | AGATTATCAAAAAGGAGTTTCTACAGTGCCTATC<br>TTG               | Reverse, downstream, <i>agrBD</i><br>deletion      |
| YDNT1005    | GTA TCA TAC TCA TAC CCT ACC TCC                         | Forward, verification <i>agrBD</i> deletion        |
| YDNT1006    | GCT TTA GCT TAT GTA AAG GAA C                           | Reverse, verification <i>agrBD</i> deletion        |
| YDNT1029    | GTGTTTTTTGTTACCCTAAGTTTGGAGCAAGAGTTT<br>GCATAAG         | Forward, upstream, <i>hrpK</i> deletion            |
| YDNT1030    | AATAAGAGAGCTAAGTAGTACTGAATAATAGTGAA<br>C                | Reverse, upstream, <i>hrpK</i> deletion            |
| YDNT1031    | TACTACTTAGCTCTCTTATTGATACTTTATTGC                       | Forward, downstream, <i>hrpK</i> deletion          |
| YDNT1032    | AGATTATCAAAAAGGAGTTTGAGCTTCTATATTAA<br>GTTCAATTG        | Reverse, downstream, <i>hrpK</i> deletion          |
| YDNT1033    | TCCATCGCTCCAAAGCTTCTGCAC                                | Forward, verification <i>hrpK</i> deletion         |
| YDNT1034    | GGGATAAGATAAAGAGCCTTGAAG                                | Reverse, verification <i>hrpK</i> deletion         |
| YDNT1057    | GTGTTTTTTGTTACCCTAAGTTTCCACACAATTAT<br>ATTCTTATC        | Forward, upstream, <i>ptsI</i> deletion            |
| YDNT1058    | AAAGGAATAGTATAGAAAAGACTTTTTAATATATAA<br>TTAATGTTATATAG  | Reverse, upstream, <i>ptsI</i> deletion            |
| YDNT1059    | CTTTTCTATACTATTCTTTGTAAGCCATAAC                         | Forward, downstream, <i>ptsI</i> deletion          |
| YDNT1060    | AGATTATCAAAAAGGAGTTTGCTTCGCTTAGAACT<br>GTTATG           | Reverse, downstream, <i>ptsI</i> deletion          |
| YDNT1039    | CAGATAGAATAGCTCCCATAGG                                  | Forward, verification <i>ptsI</i> deletion         |
| YDNT1040    | GAGGTGCTTGGATTGCCAAAGG                                  | Reverse, verification <i>ptsI</i> deletion         |
| YDNT1063    | GTGTTTTTTGTTACCCTAAGTTTAAACATAGTATTCA<br>ACAGCAG        | Forward, upstream, <i>pil2</i> cluster<br>deletion |
| YDNT1064    | ATACAGTATGAATGTAATAATGACAGTTAGAGTC                      | Reverse, upstream, <i>pil2</i> cluster<br>deletion |

|          |                                                  |                                                             |
|----------|--------------------------------------------------|-------------------------------------------------------------|
| YDNT1065 | CATTTTACATTTCATACTGTATTGCTCCTTAC                 | Forward, downstream, <i>pil2</i> cluster deletion           |
| YDNT1066 | AGATTATCAAAAAGGAGTTTTTCAGCAGAACCAATCTTAG         | Reverse, downstream, <i>pil2</i> cluster deletion           |
| YDNT1067 | CTGATGTACTCTGAGGAACTGG                           | Forward, internal verification <i>pil2</i> cluster deletion |
| YDNT1068 | GCAATGGTTGTTCCCTATGTTTG                          | Reverse, internal verification <i>pil2</i> cluster deletion |
| YDNT1069 | GTATATACTTGTATAGTATATGTG                         | Forward, external verification <i>pil2</i> cluster deletion |
| YDNT1070 | TTGGTGTAGCTTTGAGGCTATGCC                         | Reverse, external verification <i>pil2</i> cluster deletion |
| YDNT1071 | GTGTTTTTTTGTACCCTAAGTTTTCTAAGTCTAAGCTATCTCCC     | Forward, upstream, <i>pil1</i> cluster deletion             |
| YDNT1072 | ACTTTAGTGGCAGGAGGTAAGAAATGTAC                    | Reverse, upstream, <i>pil1</i> cluster deletion             |
| YDNT1073 | TTACCTCCTGCCACTAAAGTGAAACCTTTTTTATTC             | Forward, downstream, <i>pil1</i> cluster deletion           |
| YDNT1074 | AGATTATCAAAAAGGAGTTTCAGTAGCTCCTCTATTTG           | Reverse, downstream, <i>pil1</i> cluster deletion           |
| YDNT1075 | CCTTTGTGCGATTAAATTACCATC                         | Forward, internal verification <i>pil1</i> cluster deletion |
| YDNT1076 | TAATGAATCAGTGCAAGAAAGTC                          | Reverse, internal verification <i>pil1</i> cluster deletion |
| YDNT1077 | CTGTAATGTGGGCACCTTGGAGC                          | Forward, external verification <i>pil1</i> cluster deletion |
| YDNT1078 | CTGCTAAGTCTTGACCAGCTTCTG                         | Reverse, external verification <i>pil1</i> cluster deletion |
| YDNT1091 | GTGTTTTTTTGTACCCTAAGTTTTGATGAATACTTGAATTGGTTG    | Forward, upstream, <i>fumAB-CD10050</i> deletion            |
| YDNT1092 | TTAGCAACATCTCAAGCGAACATCCCTC                     | Reverse, upstream, <i>fumAB-CD10050</i> deletion            |
| YDNT1093 | TTCGCTTGAGATGTTGCTAAGGCAGTTAAAG                  | Forward, downstream, <i>fumAB-CD630_10050</i> deletion      |
| YDNT1094 | AGATTATCAAAAAGGAGTTTATAACTGAACCTCCAAATAAC        | Reverse, downstream, <i>fumAB-CD630_10050</i> deletion      |
| YDNT1095 | TGGATGGTGTGAGGTGGCACATG                          | Forward, verification <i>fumAB-CD630_10050</i> deletion     |
| YDNT1096 | CTGATACTCTGGAAGAACAAGC                           | Reverse, verification <i>fumAB-CD630_10050</i> deletion     |
| YDNT1103 | GTGTTTTTTTGTACCCTAAGTTTTCATATCTTGTACTGTTGGTG     | Forward, upstream, <i>bcsA</i> deletion                     |
| YDNT1104 | TGATTTTATGAAGGAACCCATGGAATATATTTAGG              | Reverse, upstream, <i>bcsA</i> deletion                     |
| YDNT1105 | CCATGGGTTCCCTTCATAAAATCACCTCTTTTC                | Forward, downstream, <i>bcsA</i> deletion                   |
| YDNT1106 | AGATTATCAAAAAGGAGTTTCATGATGTACTTTAATTTGCTATAATAG | Reverse, downstream, <i>bcsA</i> deletion                   |
| YDNT1107 | GTAAGTGTGGTGATTGCTCAGG                           | Forward, verification <i>bcsA</i> deletion                  |
| YDNT1108 | GGCAACAGATAGCTAATAGG                             | Reverse, verification <i>bcsA</i> deletion                  |
| YDNT1041 | GTGTTTTTTTGTACCCTAAGTTTTCTTAGTCTCTTAAATGATTCAAGG | Forward, upstream, <i>ccpA</i> deletion                     |
| YDNT1042 | TTCTATAAGGCCTGCTTGTGTTAGCAACATC                  | Reverse, upstream, <i>ccpA</i> deletion                     |
| YDNT1043 | AACAAGCAGGCCTTATAGAATTGTTGATAGAGAAAG             | Forward, downstream, <i>ccpA</i> deletion                   |
| YDNT1044 | AGATTATCAAAAAGGAGTTTAGATATTACCATTACTCAATGC       | Reverse, downstream, <i>ccpA</i> deletion                   |
| YDNT1045 | GTTGATAGATACAATAAACTGGTG                         | Forward, verification <i>ccpA</i> deletion                  |

|           |                                                                 |                                                        |
|-----------|-----------------------------------------------------------------|--------------------------------------------------------|
| YDNT1046  | CCGTTTCATCTTCTGTATCTACC                                         | Reverse, verification <i>ccpA</i> deletion             |
| YDNT1097  | gtgtttttgttaccctaagtttGACCTTCTTGAGTGTAATG                       | Forward, upstream, <i>nanAE-CD630_2339</i> deletion    |
| YDNT1098  | catgccaagcAAGCTGAGACTACTGTTTATTATG                              | Reverse, upstream, <i>nanAE-CD630_2339</i> deletion    |
| YDNT1099  | gtctcagcttGCTTGGCATGATACTATTAATC                                | Forward, downstream, <i>nanAE-CD630_2339</i> deletion  |
| YDNT1100  | agattatcaaaaaggagtttGCAAATGGAATTTTCAGTAAC                       | Reverse, downstream, <i>nanAE-CD630_2339</i> deletion  |
| YDNT1101  | CCATCACCTTCTGAAGTCTCTAGC                                        | Forward, verification <i>nanAE-CD630_2339</i> deletion |
| YDNT1102  | GTGAGATAGATACAGAGGCTG                                           | Reverse, verification <i>nanAE-CD630_2339</i> deletion |
| MO13      | TTTTTTGTTACCCTAAGTTTGTATAGAGGTGTTAGACTTTATTC                    | Forward, upstream, <i>cstA</i> deletion                |
| MO14      | ACTAACTTGCGCTTACCATAAAATTCATCCC                                 | Reverse, upstream, <i>cstA</i> deletion                |
| MO15      | TATGGTAAGCGCAAGTTAGTAAAATAATAACTATAAAAATTAATAATTTATATTTAAATTATG | Forward, downstream, <i>cstA</i> deletion              |
| MO16      | AGATTATCAAAAAGGAGTTTCCCATATTATTTTCTTCATG                        | Reverse, downstream, <i>cstA</i> deletion              |
| MO17      | GTGGAATAGAGGTAGTAAGTGAA                                         | Forward, verification <i>cstA</i> deletion             |
| MO18      | CCCTCTTTTTTATCTGAAATC                                           | Reverse, verification <i>cstA</i> deletion             |
| DBYT0007  | TTTTTTGTTACCCTAAGTTTCTACTTACCAATCCTTGTC                         | Forward, upstream, <i>cwp29</i> deletion               |
| DBYT0008  | ATGTTTGTGCGTAATAGTGAGAGTGAAAATACCATCAATAATATTAG                 | Reverse, upstream, <i>cwp29</i> deletion               |
| DBYT0009  | GTATTTTCACACTCTCACTATTACGCAACAAACATTGACACTAAC                   | Forward, downstream, <i>cwp29</i> deletion             |
| DBYT0010  | AAAGGAGTTTGCTTGTACTGAACTAGGATTTAC                               | Reverse, downstream, <i>cwp29</i> deletion             |
| DBYT 0040 | TTTCTCCTGGCTTTAATACACC                                          | Forward, verification <i>cwp29</i> deletion            |
| DBYT 0041 | TTGCCAGTTGTTTCTCTATG                                            | Reverse, verification <i>cwp29</i> deletion            |
| DBYT0019  | CCCTAAGTTTCCAGCATCAATAATAGCG                                    | Forward, upstream, <i>CD630_08650</i> deletion         |
| DBYT0020  | TAGCTGCCTCGCATAATCTCTCCACTTC                                    | Reverse, upstream, <i>CD630_08650</i> deletion         |
| DBYT0021  | GAGATTATGCGAGGCAGCTAATCTTGCTG                                   | Forward, downstream, <i>CD630_08650</i> deletion       |
| DBYT0022  | AAAGGAGTTTCCACATAATTGATTAATATATCTGGTATTC                        | Reverse, downstream, <i>CD630_08650</i> deletion       |
| DBYT0042  | GACAGTTCTAGTGCAACAGTTGC                                         | Forward, verification <i>CD630_08650</i> deletion      |
| DBYT0043  | GTAATTATCTCCACCACTATTACC                                        | Reverse, verification <i>CD630_08650</i> deletion      |
| YDNT1109  | AGCGTTAACAGATCTGAGCTAGGAGGTAGGGTTATGGC                          | Forward, complementation <i>ptsI</i>                   |
| YDNT1110  | AAGTTTATTAATACTTATAGTTATATTAATAAGTCTTTTCTATATAGCTTTTTATTTTC     | Reverse, complementation <i>ptsI</i>                   |
| YDNT1111  | ATTCGAGCTCGGTACCCGGGTAATATAATAAAAAA<br>GCTATATAAAATTTGAATTTTTC  | Forward, complementation <i>cdsB</i>                   |
| YDNT1112  | AGCTTGCATGTCTGCAGGCCCTAGTCAACTTTATTCATATCATTC                   | Reverse, complementation <i>cdsB</i>                   |
| qYDNT001  | AAAATTCCTGGGTTGGATCGAC                                          | Forward, qRT-PCR <i>rex</i> ( <i>CD630_0171</i> )      |
| qYDNT002  | TCCAGCTTTTCTAAATCCTGCA                                          | Reverse, qRT-PCR <i>rex</i> ( <i>CD630_01710</i> )     |



|              |                                   |                                                |
|--------------|-----------------------------------|------------------------------------------------|
| qYDNT003     | ATTCATGCGCAGGTCCTAGA              | Forward, qRT-PCR CD630_08650                   |
| qYDNT004     | TGCTCTTTACTTGGCTGACC              | Reverse, qRT-PCR CD630_08650                   |
| qYDNT005     | TGACAGAACGCTACCTTTTGA             | Forward, qRT-PCR CD630_12640                   |
| qYDNT006     | TGCTTCTAAAACCTTGTGCCTCT           | Reverse, qRT-PCR CD630_12640                   |
| qYDNT009     | GAACTTGTGCAGCTTCTCCT              | Forward, qRT-PCR CD630_34580                   |
| qYDNT010     | AGGTAGAGTAGGTATGGCAGT             | Reverse, qRT-PCR CD630_34580                   |
| IMV464       | AAATACGAAACGGCTGCTCT              | Forward, qRT-PCR <i>cwp29</i><br>(CD630_25180) |
| IMV465       | AAATTGGTGCATTTGTTGCTC             | Reverse, qRT-PCR <i>cwp29</i><br>(CD630_25180) |
| IMV369       | ATGTTGAGCTTTTAGGTGCAGT            | Forward, qRT-PCR <i>spo0A</i>                  |
| IMV370       | CAACTTTTCTCTACTCCATGC             | Reverse, qRT-PCR <i>spo0A</i>                  |
| QRTBD61-codY | AAGTGGTGAAGCAGTGTCTCTTT           | Forward, qRT-PCR <i>codY</i>                   |
| QRTBD62-codY | GCACTTACTACATAAACATTAGAACTTAAAACG | Reverse, qRT-PCR <i>codY</i>                   |

## Supplementary References

- Hussain HA, Roberts AP, Mullany P.. Generation of an erythromycin-sensitive derivative of *Clostridium difficile* strain 630 (630Deltaerm) and demonstration that the conjugative transposon Tn916DeltaE enters the genome of this strain at multiple sites. *J Med Microbiol.* **54**:137-141. (2005)
- Saujet L, et al.. The key sigma factor of transition phase, SigH, controls sporulation, metabolism, and virulence factor expression in *Clostridium difficile*. *J Bacteriol.* **193**, 3186-3196. (2011)
- Pereira FC, et al.. The spore differentiation pathway in the enteric pathogen *Clostridium difficile*. *PLoS Genet.* **9**, e1003782 (2013)
- Poquet I, et al. *Clostridium difficile* Biofilm: remodeling metabolism and cell surface to build a sparse and heterogeneously aggregated architecture. *Front Microbiol.* **9**, 2084. doi: 10.3389/fmicb.2018.02084 (2018)
- El Meouche I, et al. Characterization of the SigD regulon of *C. difficile* and its positive control of toxin production through the regulation of *tcdR*. *PLoS One.* **8**, e83748 (2013)
- Dubois T, et al. Control of *Clostridium difficile* physiopathology in response to cysteine availability. *Infect. Immun.* **84**, 2389-405 (2016)
- Soutourina, O.A., et al. Genome-wide identification of regulatory RNAs in the human pathogen *Clostridium difficile*. *PLoS Genet.* **9**, e1003493 (2013).
- Heap JT, et al. A modular system for *Clostridium* shuttle plasmids. *J. Microbiol. Methods* **78**, 79-85. (2009)
- Peltier, J, et al. Type I toxin-antitoxin systems contribute to the maintenance of mobile genetic elements in *Clostridioides difficile*. *Commun Biol.* 718 (2020)
